# Supplementary material for: Treatment outcomes in patients with large B‐cell lymphoma after progression to chimeric antigen receptor T‐cell therapy
Source: PubMed Central journal article supplement — Hemasphere. 2024 May 21;8(5):e62. doi: 10.1002/hem3.62 (PMC11106798; doi:10.1002/hem3.62), 2024-05-21

**Complete Response** **Partial Response** **Stable Disease** **Progressive Disease**

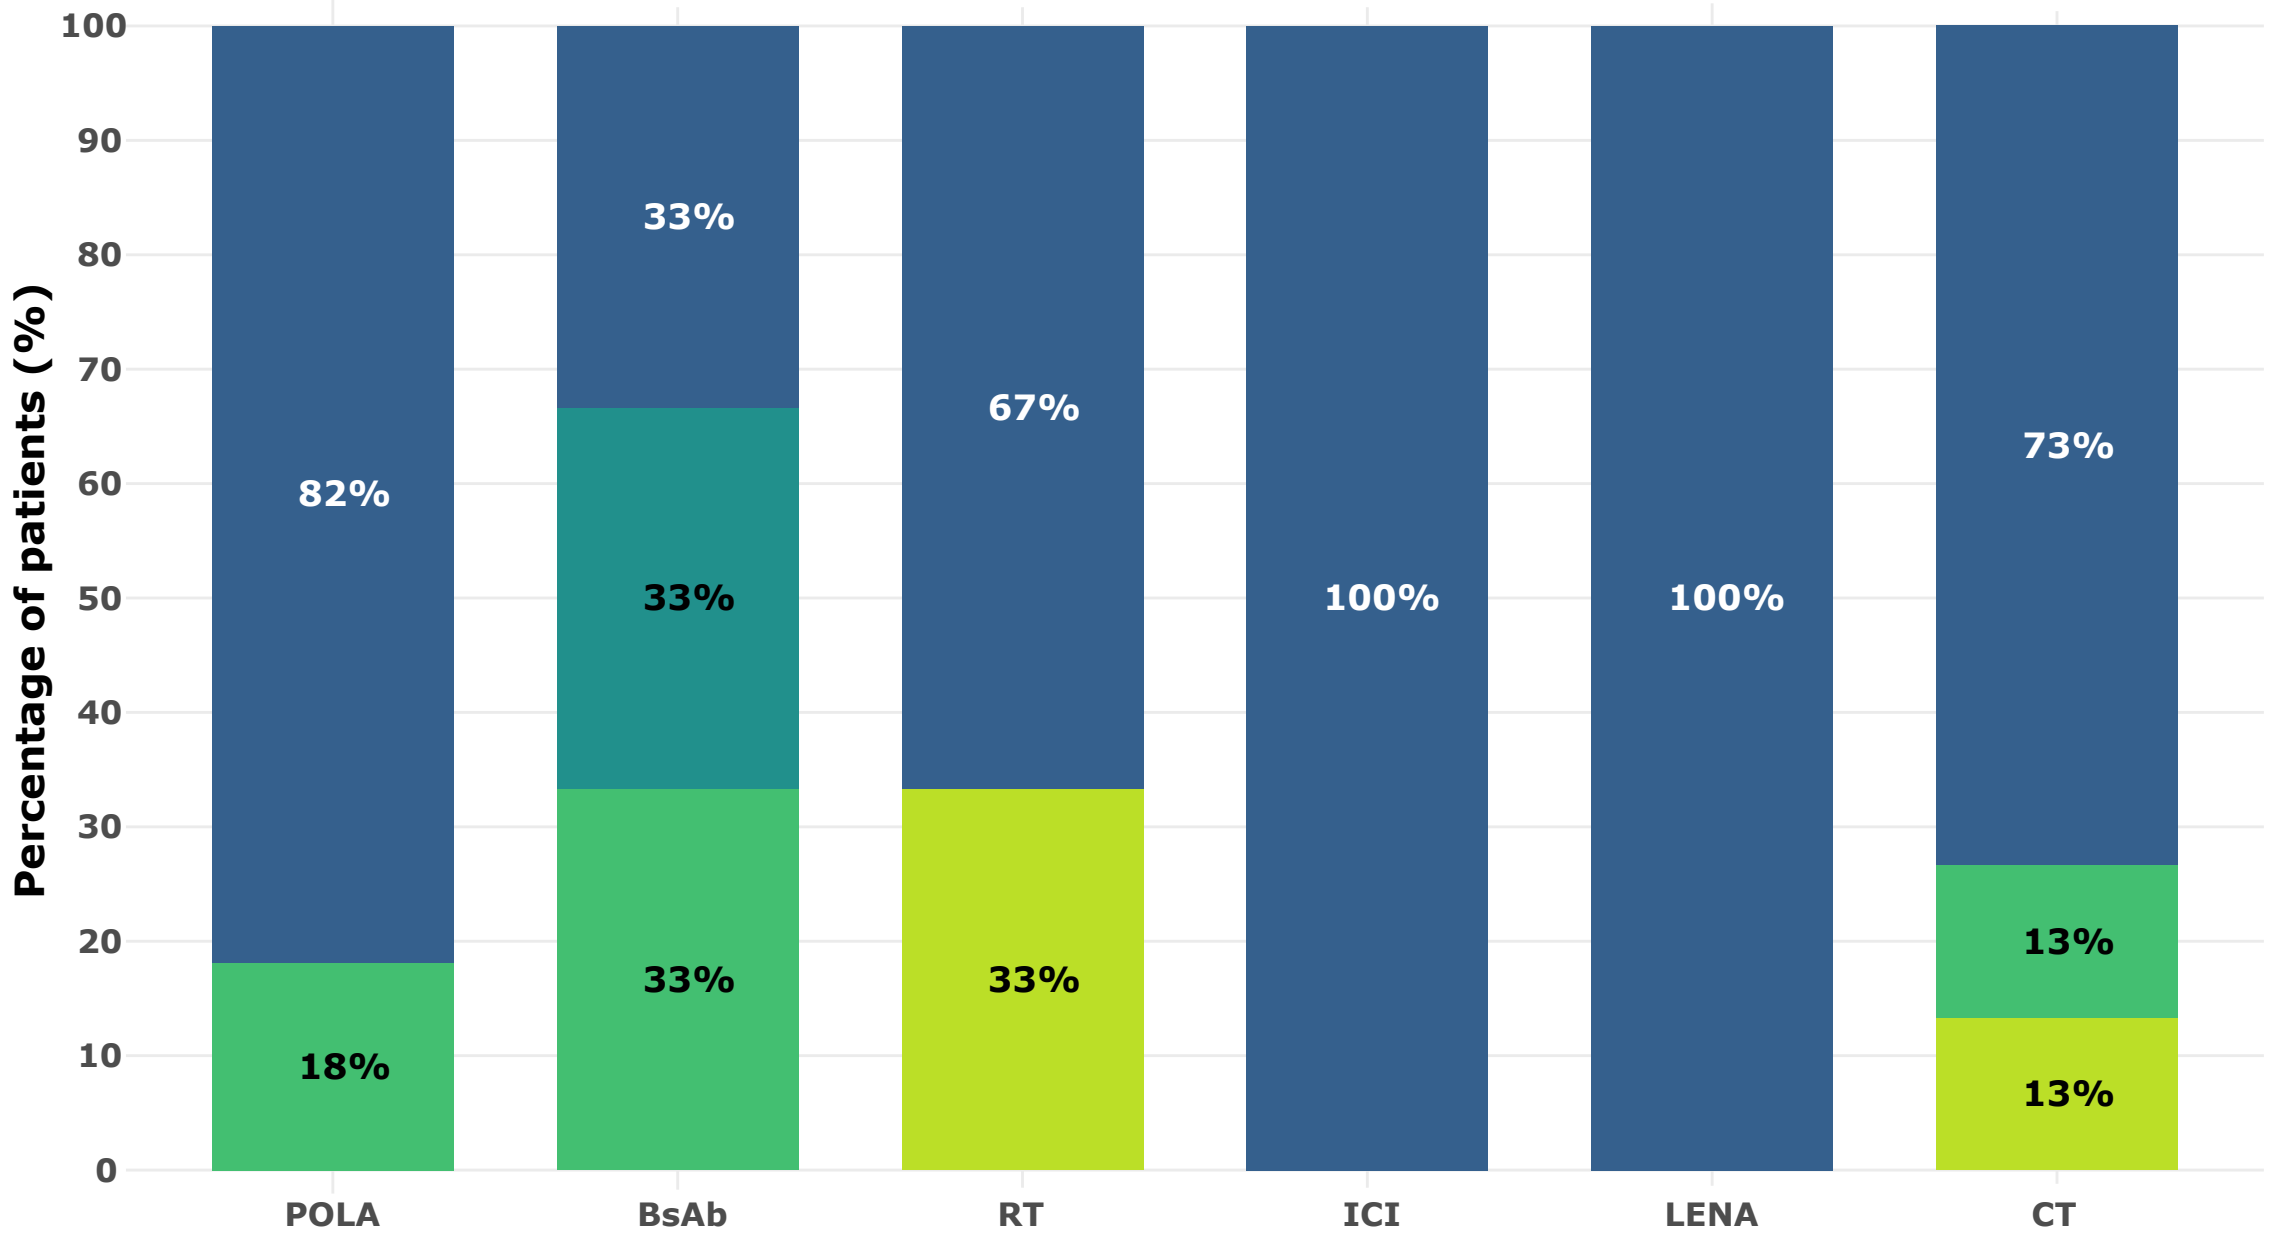

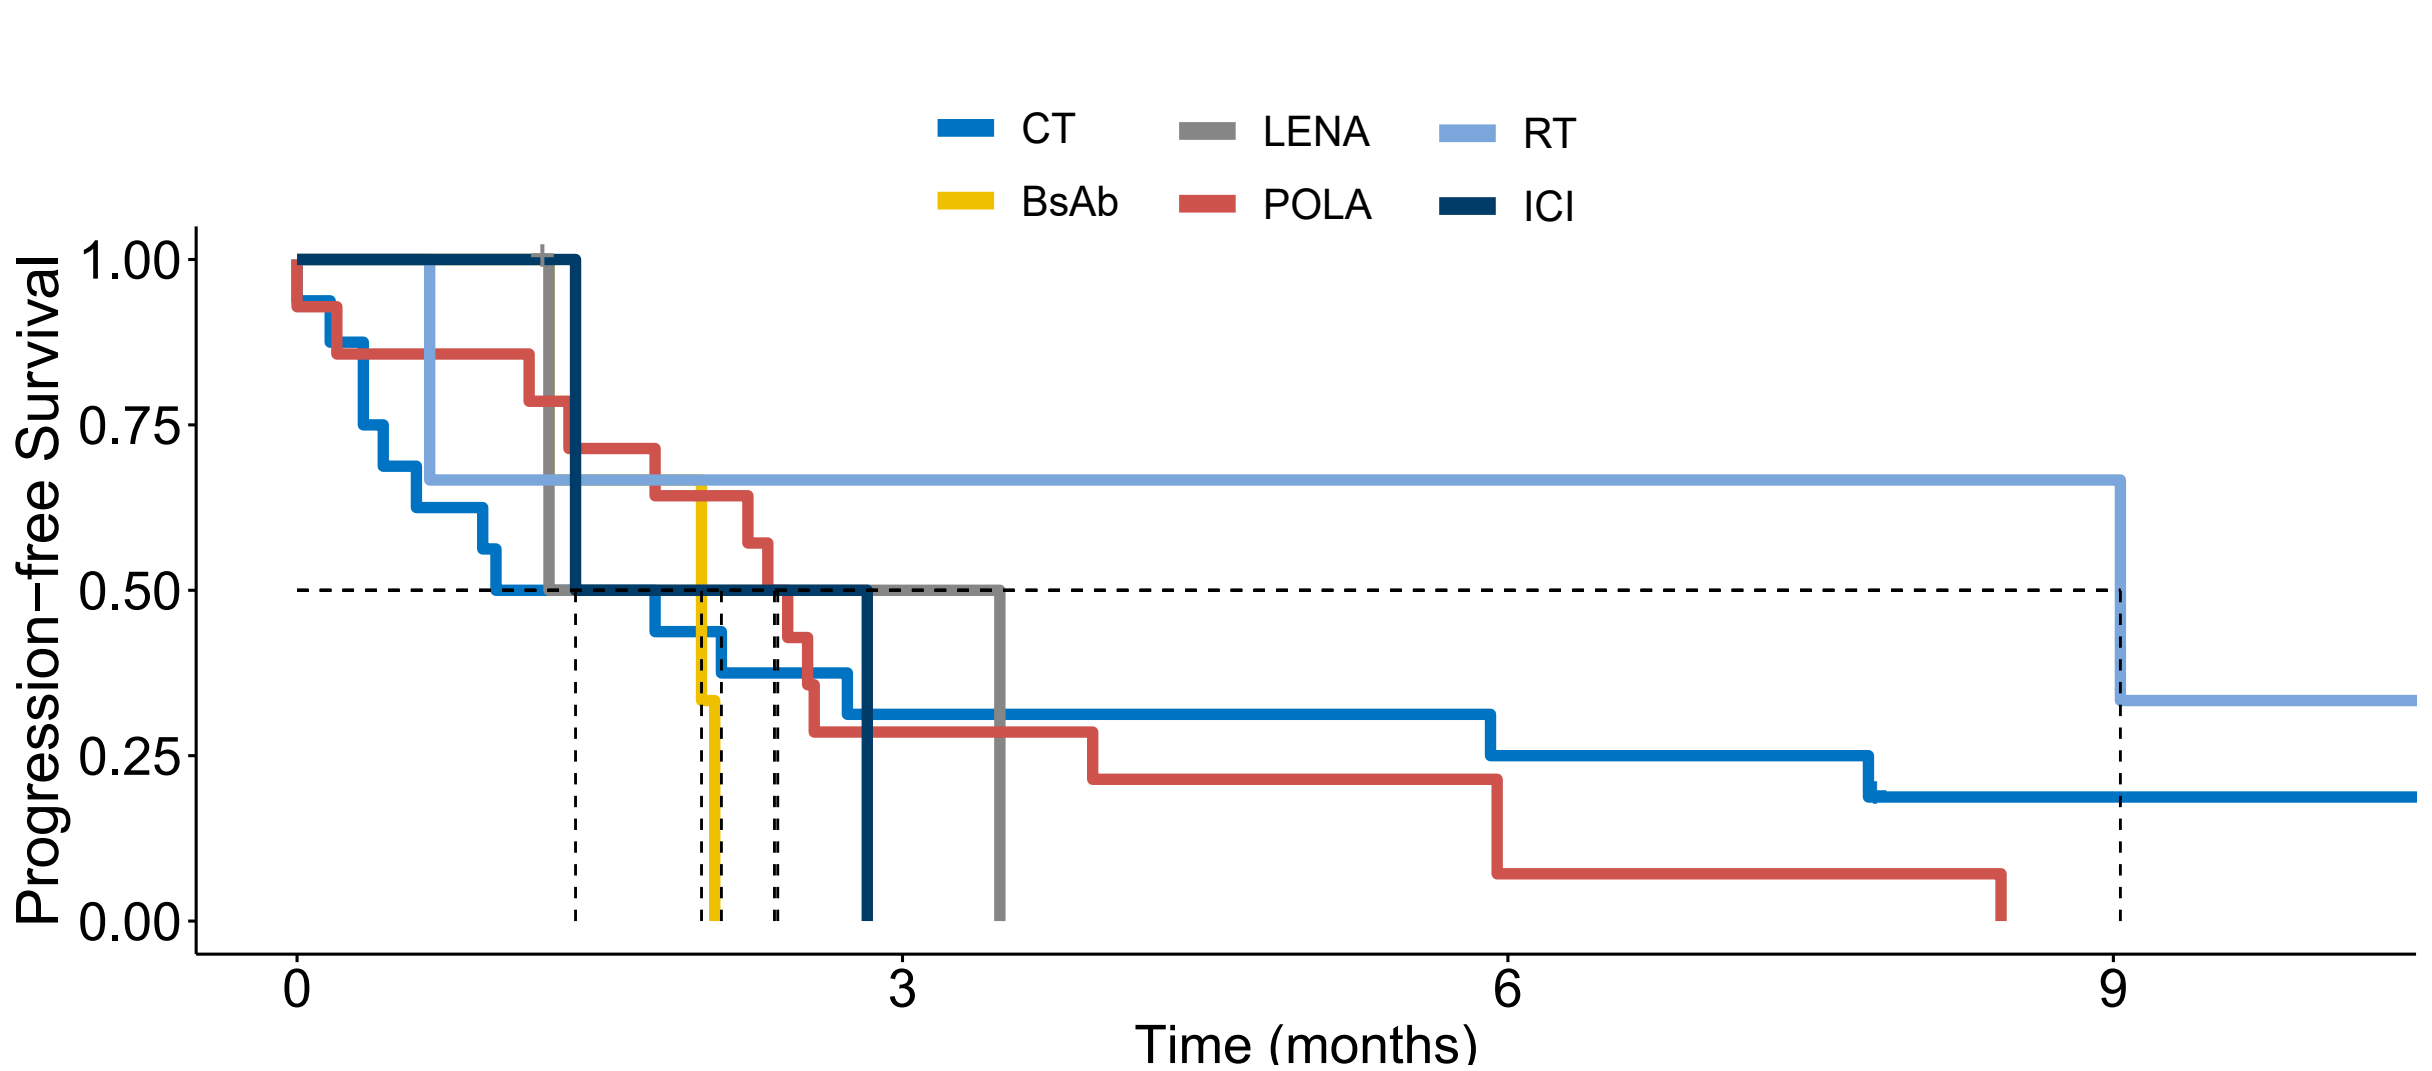

N. at risk

|      | 0  | 3 | 6 | 9 |
|------|----|---|---|---|
| CT   | 16 | 5 | 4 | 2 |
| BsAb | 3  | 0 | 0 | 0 |
| LENA | 3  | 1 | 0 | 0 |
| POLA | 14 | 4 | 1 | 0 |
| RT   | 3  | 2 | 2 | 2 |
| ICI  | 2  | 0 | 0 | 0 |

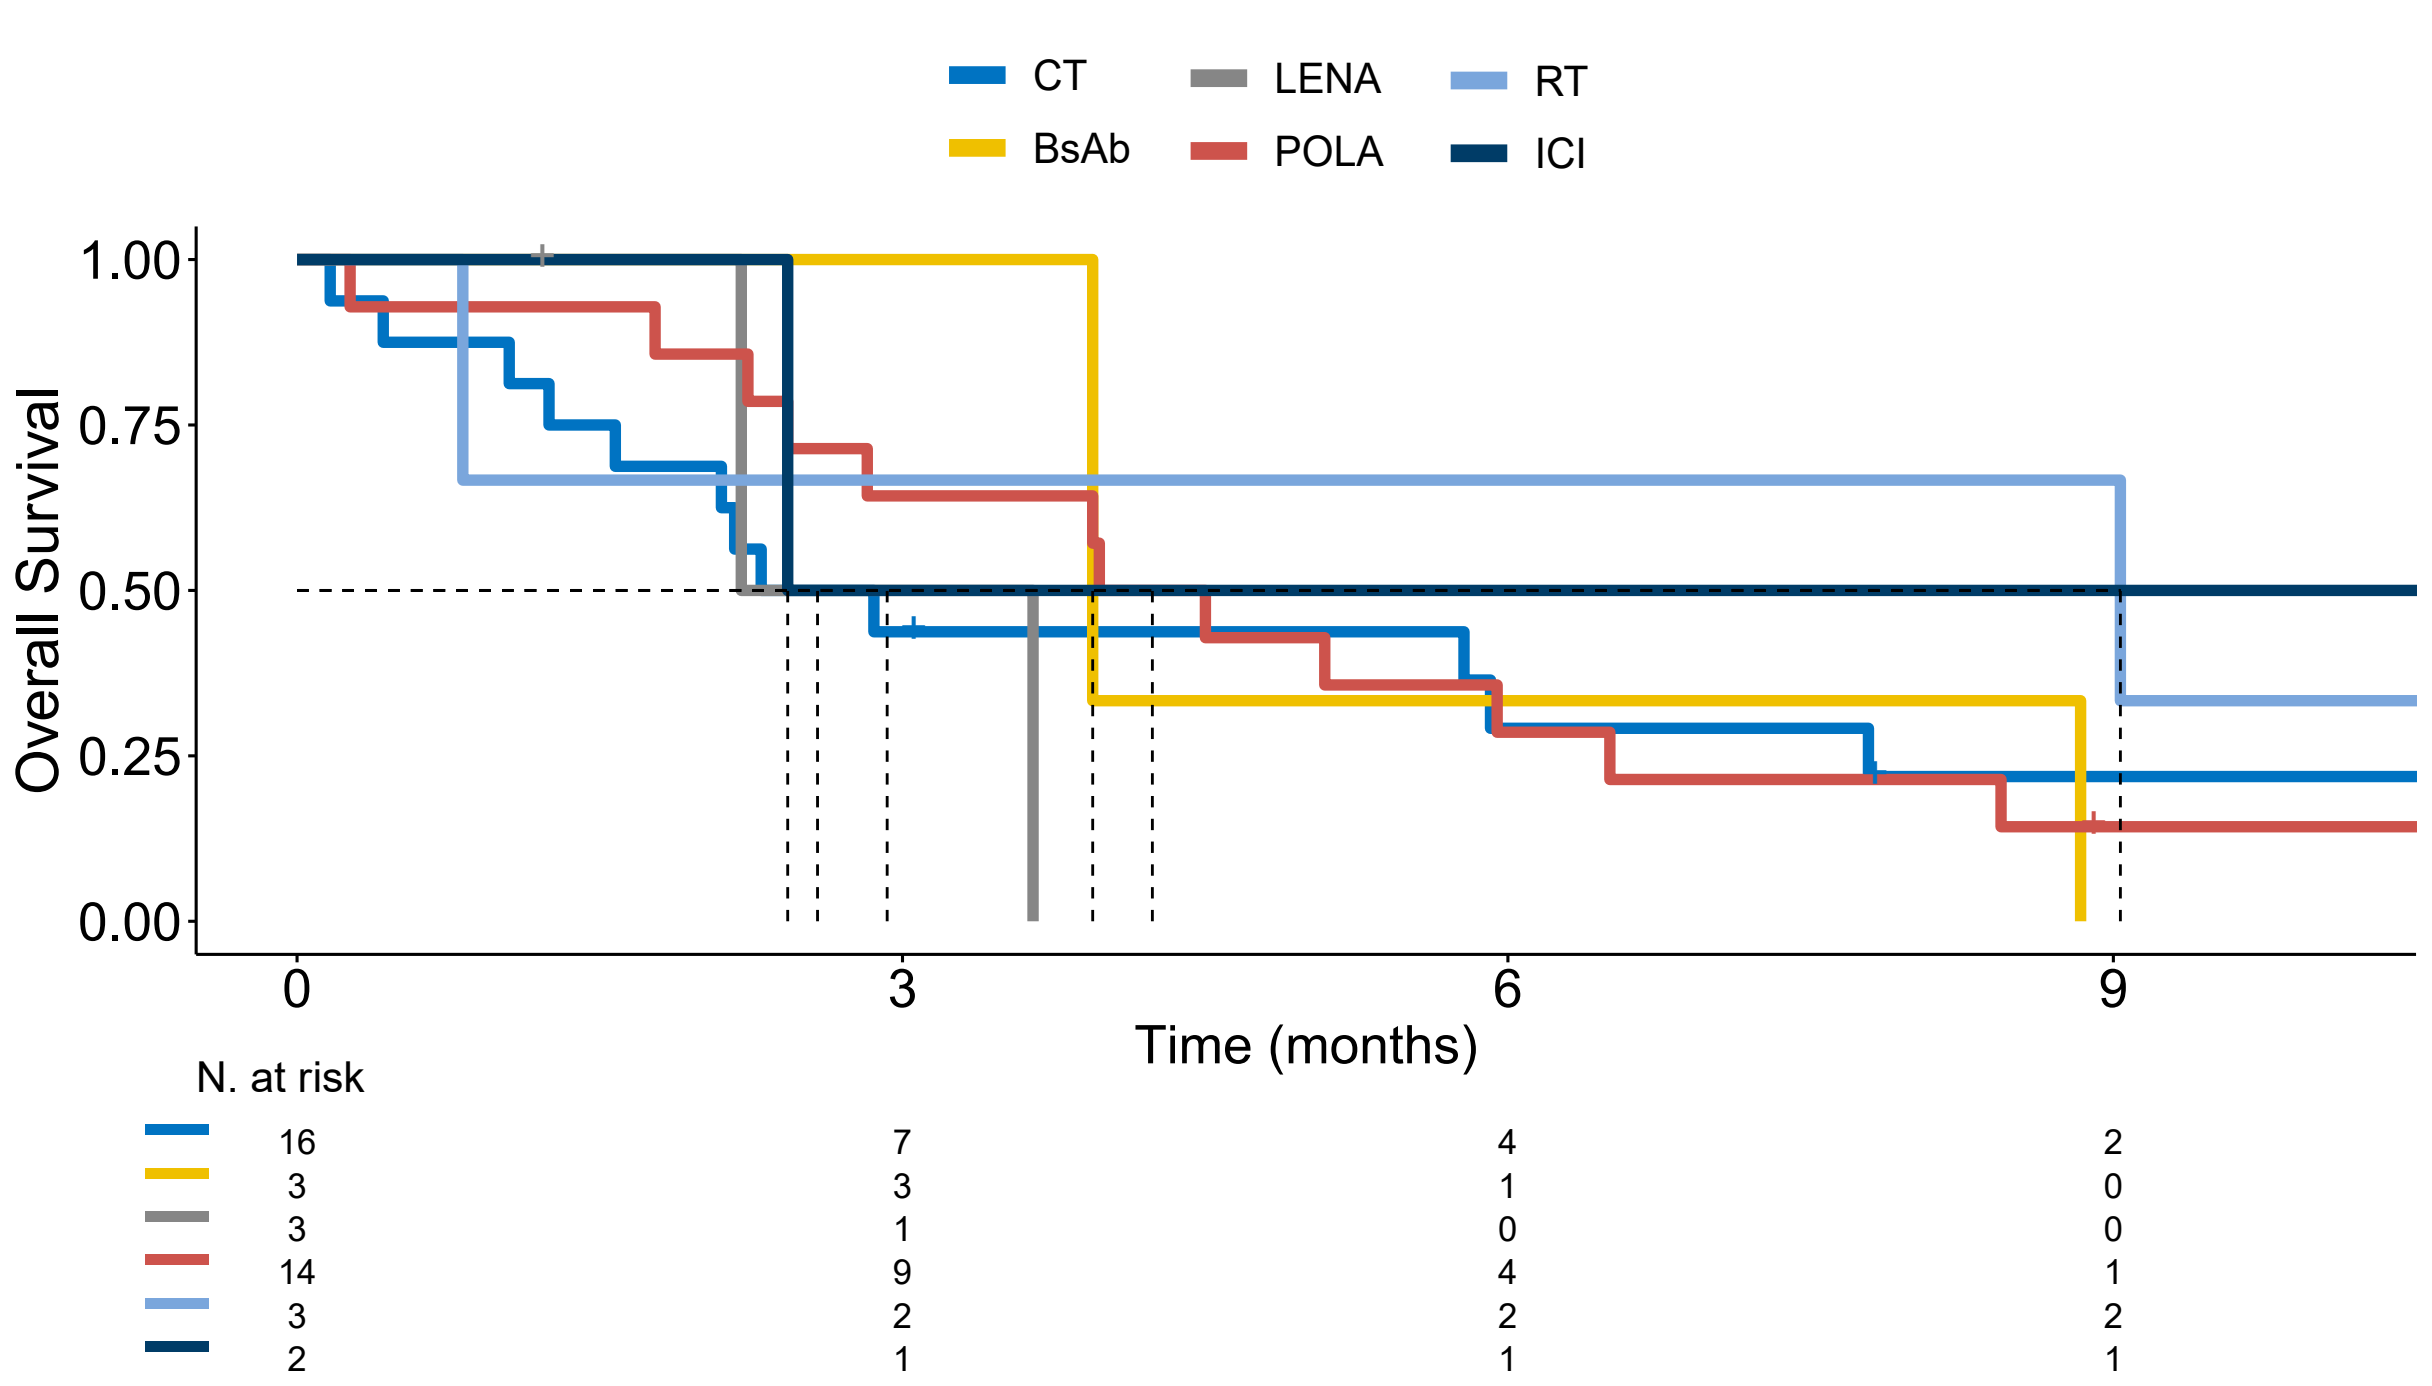

Supplement: HEM3-8-e62-s001.pdf [file HEM3-8-e62-s001.pdf]
