# Supplementary material for: Treatment outcomes in patients with large B‐cell lymphoma after progression to chimeric antigen receptor T‐cell therapy
Source: PubMed Central journal article supplement — Hemasphere. 2024 May 21;8(5):e62. doi: 10.1002/hem3.62 (PMC11106798; doi:10.1002/hem3.62), 2024-05-21
Supplement: HEM3-8-e62-s002.pdf [file HEM3-8-e62-s002.pdf]

# Progression-free Survival

N events / N patients    Median (months)    Hazard-ratio (95% CI)    p-value

## Global (n=225)

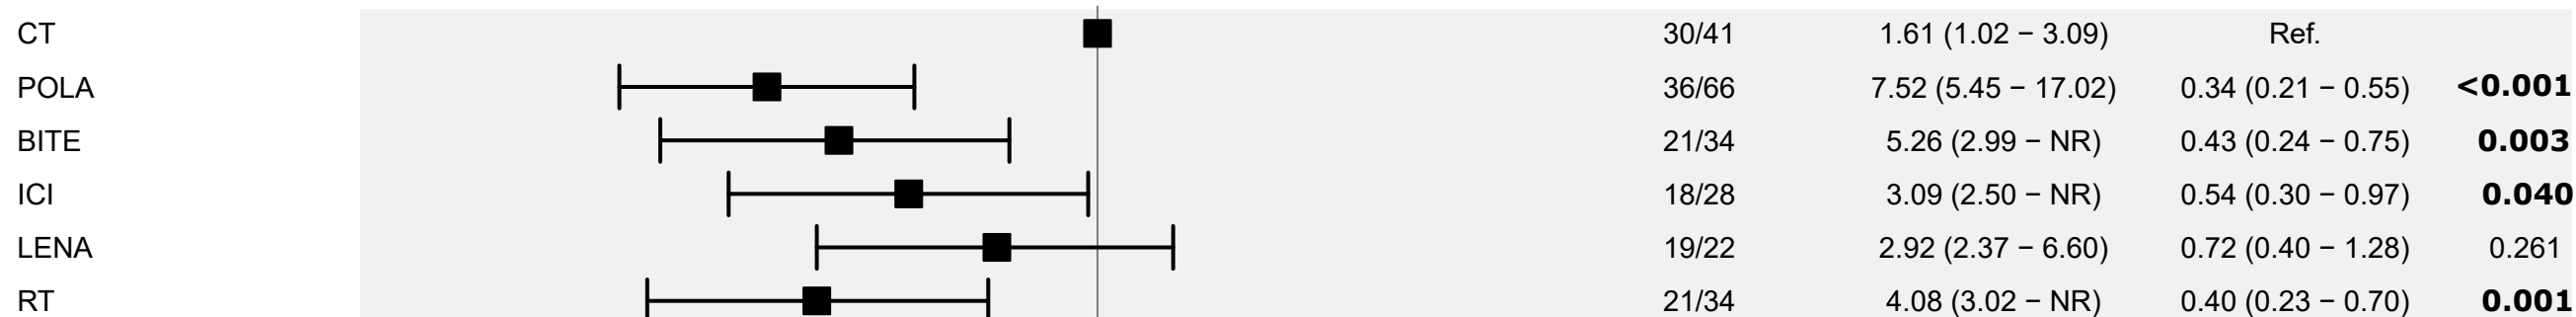

## CAR-T PD < 2m (n=76)

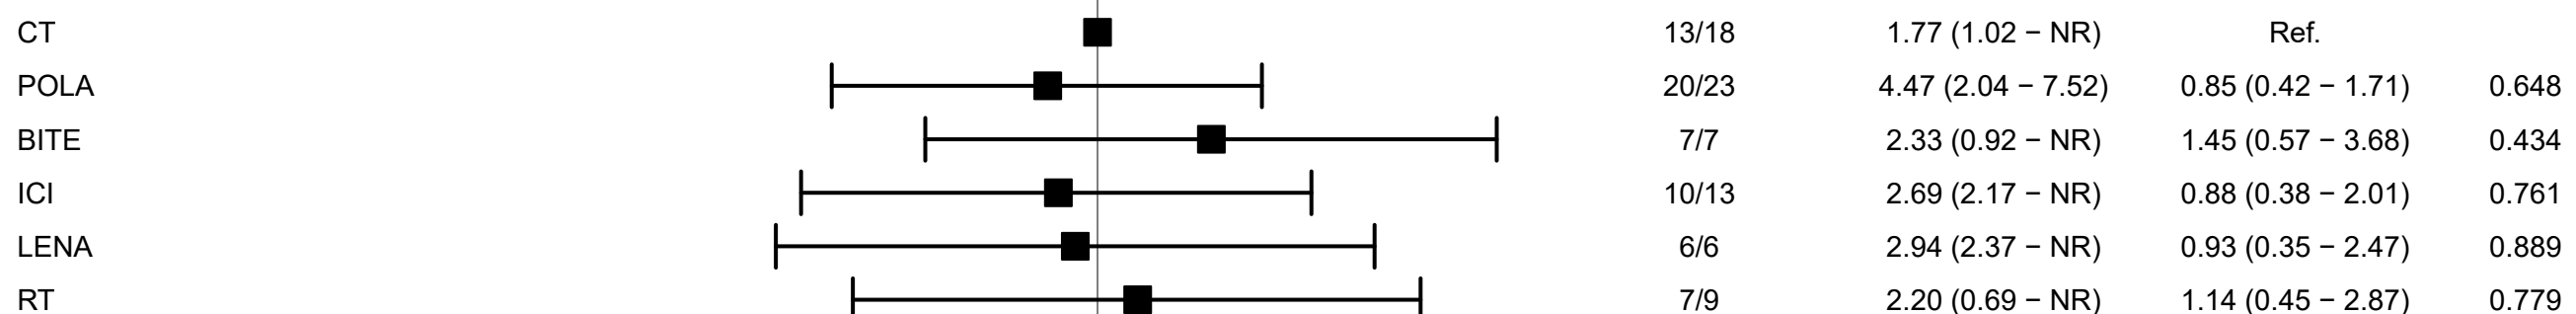

## CAR-T PD 2–6m (n=118)

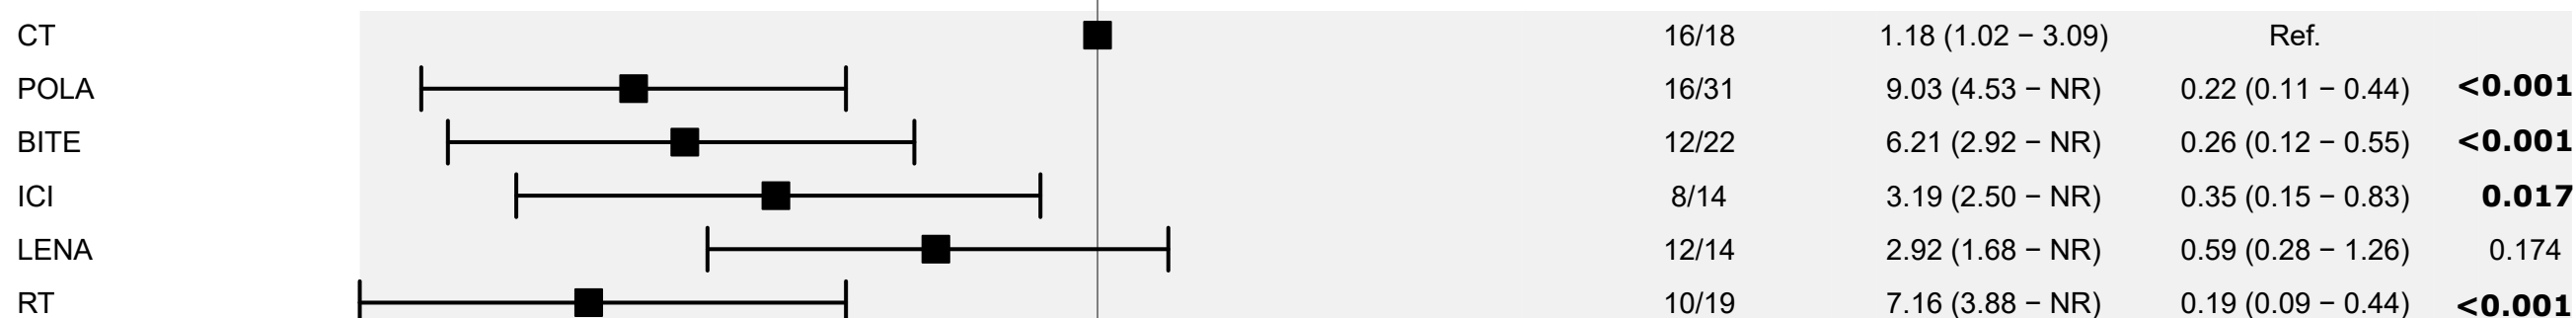

## CAR-T PD >6m (n=31)

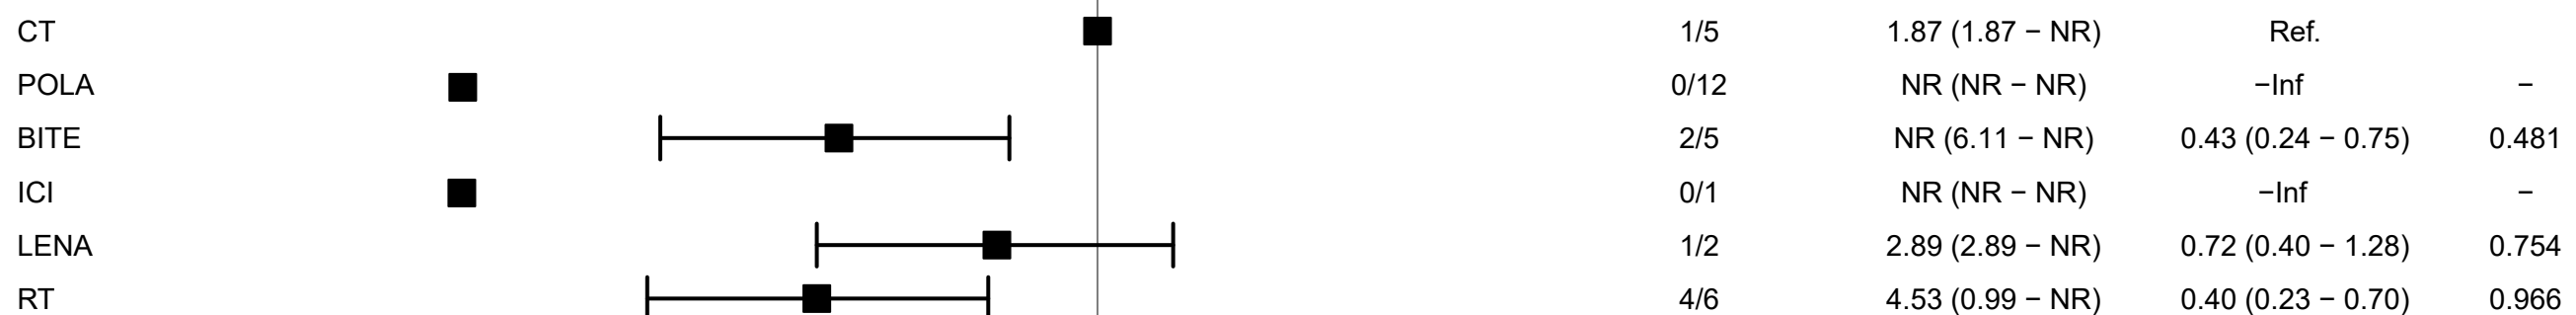

0.1    0.25    0.50    1.0    2.0    4.0
