# Supplementary material for: Treatment outcomes in patients with large B‐cell lymphoma after progression to chimeric antigen receptor T‐cell therapy
Source: PubMed Central journal article supplement — Hemasphere. 2024 May 21;8(5):e62. doi: 10.1002/hem3.62 (PMC11106798; doi:10.1002/hem3.62), 2024-05-21
Supplement: HEM3-8-e62-s009.pdf [file HEM3-8-e62-s009.pdf]

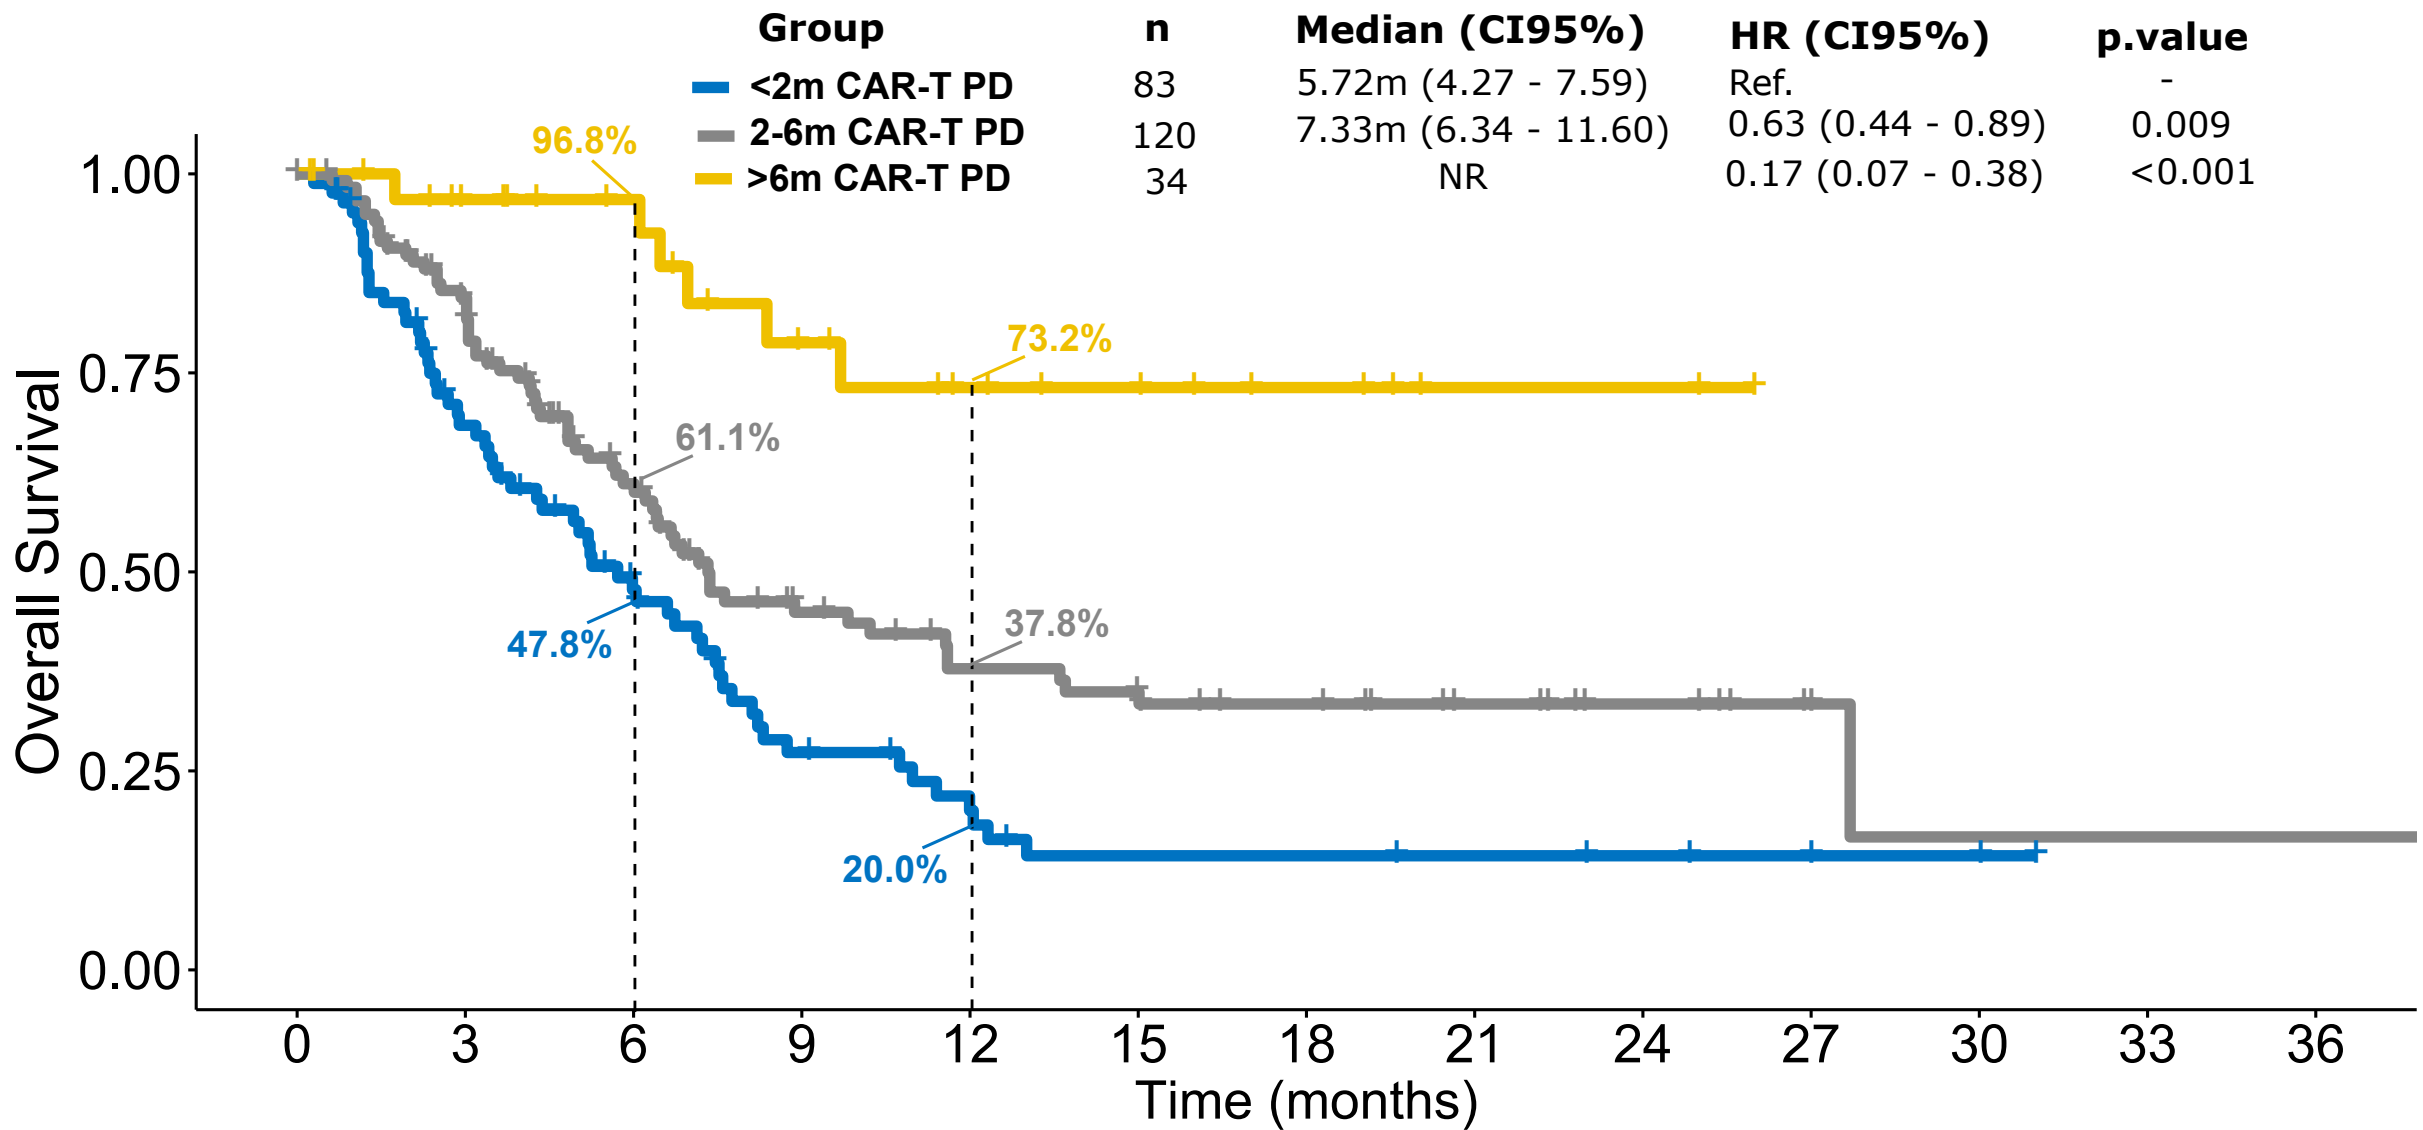

N. at risk

|                        | 0   | 3  | 6  | 9  | 12 | 15 | 18 | 21 | 24 | 27 | 30 | 33 | 36 |
|------------------------|-----|----|----|----|----|----|----|----|----|----|----|----|----|
| <b>&lt;2m CAR-T PD</b> | 120 | 93 | 57 | 34 | 26 | 23 | 19 | 14 | 9  | 4  | 1  | 1  | 1  |
| <b>2-6m CAR-T PD</b>   | 83  | 52 | 32 | 17 | 11 | 7  | 7  | 6  | 5  | 4  | 2  | 0  | 0  |
| <b>&gt;6m CAR-T PD</b> | 34  | 27 | 23 | 15 | 11 | 8  | 5  | 2  | 2  | 0  | 0  | 0  | 0  |

| Group         | n   | Median (CI95%)      | HR (CI95%)         | p.value |
|---------------|-----|---------------------|--------------------|---------|
| <2m CAR-T PD  | 82  | 2.69m (2.07 - 3.81) | Ref.               | -       |
| 2-6m CAR-T PD | 120 | 4.01m (3.02 - 7.00) | 0.60 (0.43 - 0.83) | 0.002   |
| >6m CAR-T PD  | 34  | NR                  | 0.22 (0.11 - 0.43) | <0.001  |

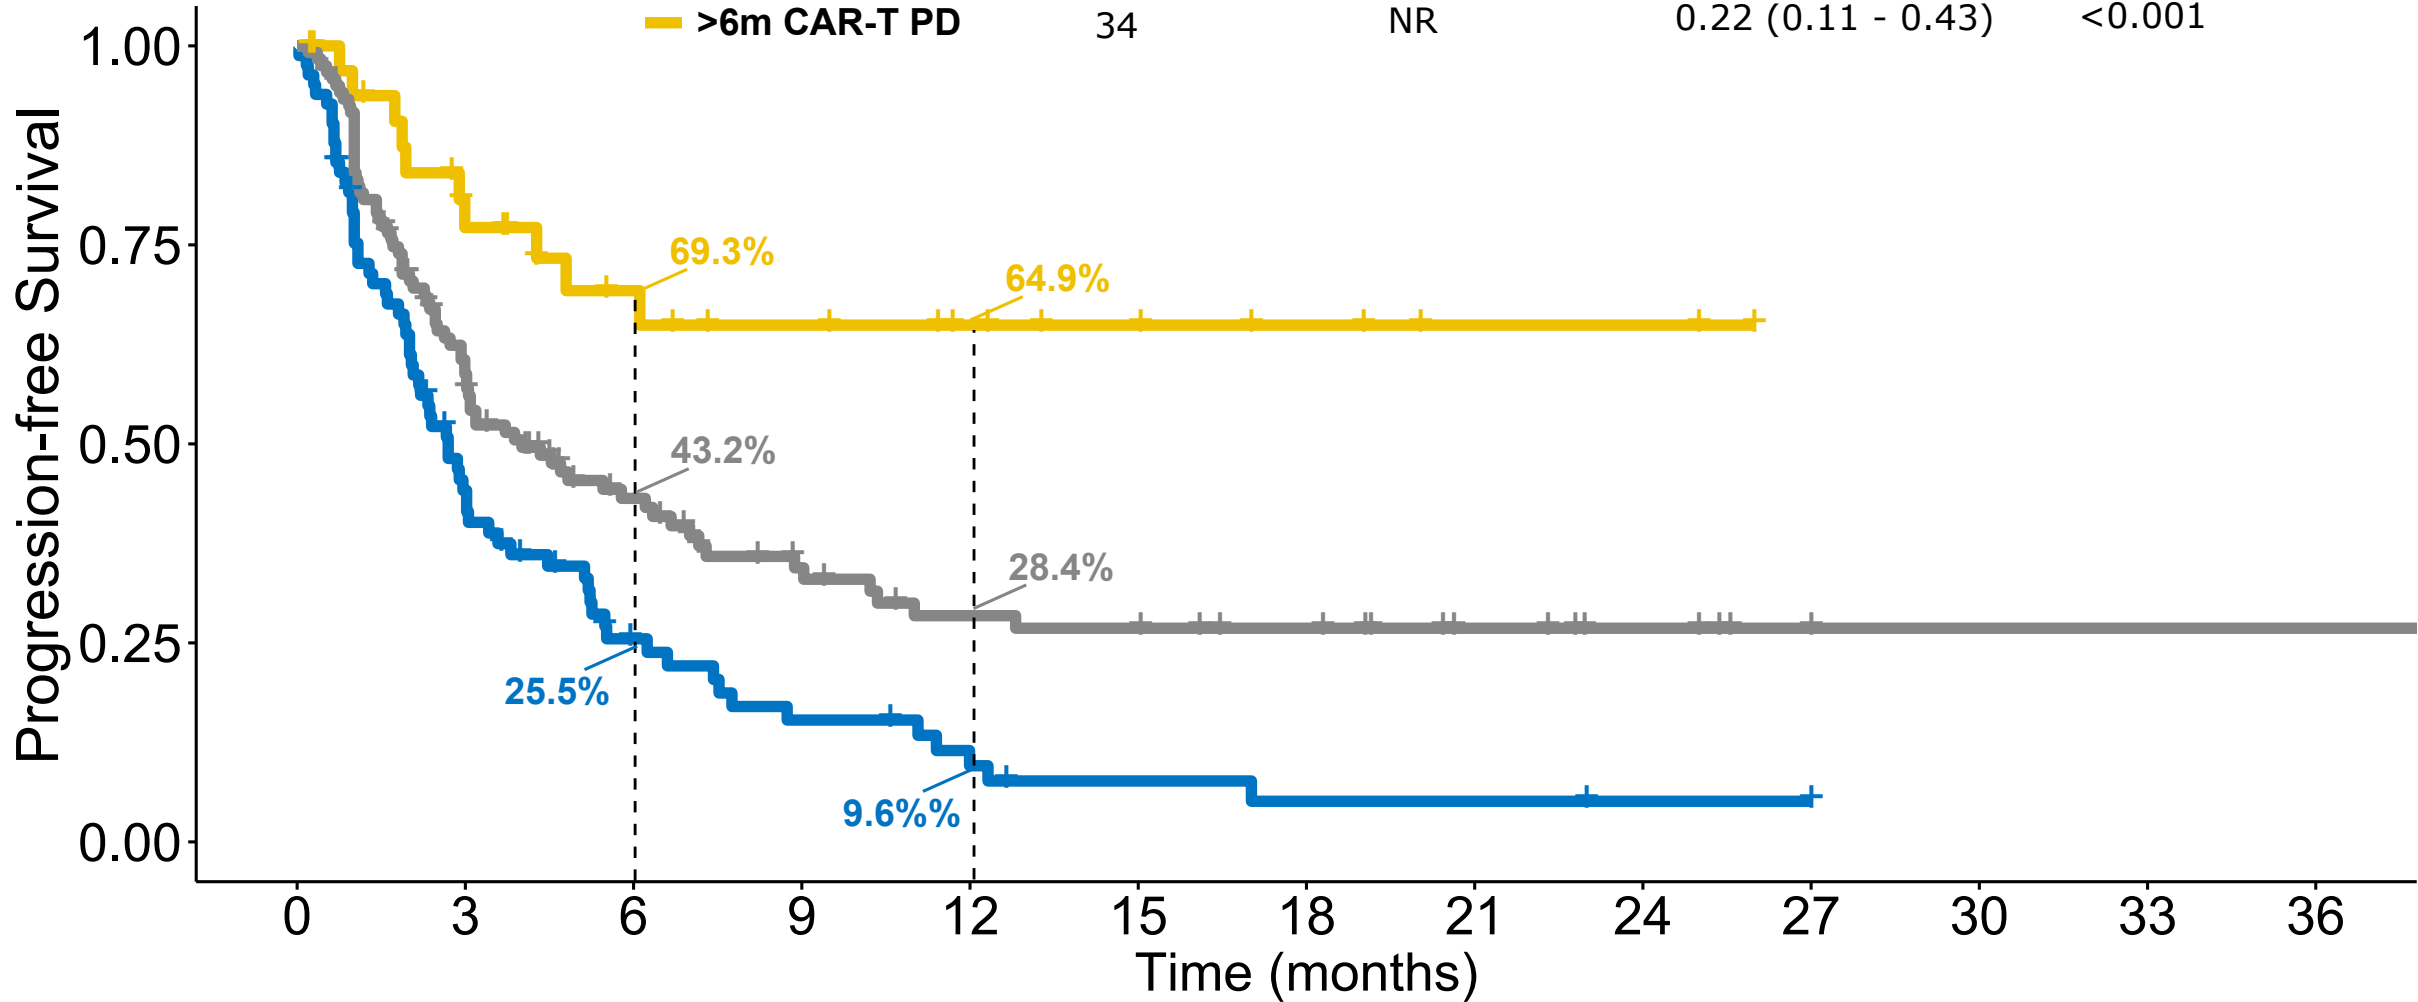

| N. at risk                            |               | 0   | 3  | 6  | 9  | 12 | 15 | 18 | 21 | 24 | 27 | 30 | 33 | 36 |
|---------------------------------------|---------------|-----|----|----|----|----|----|----|----|----|----|----|----|----|
| <span style="color: blue;">■</span>   | <2m CAR-T PD  | 120 | 65 | 38 | 24 | 18 | 17 | 14 | 9  | 6  | 2  | 1  | 1  | 1  |
| <span style="color: grey;">■</span>   | 2-6m CAR-T PD | 82  | 33 | 15 | 9  | 5  | 3  | 2  | 2  | 1  | 1  | 0  | 0  | 0  |
| <span style="color: yellow;">■</span> | >6m CAR-T PD  | 34  | 22 | 16 | 12 | 9  | 6  | 4  | 2  | 2  | 0  | 0  | 0  | 0  |
