# Supplementary figures and images for: Treatment outcomes in patients with large B‐cell lymphoma after progression to chimeric antigen receptor T‐cell therapy
Source: PubMed Central journal article supplement — Hemasphere. 2024 May 21;8(5):e62. doi: 10.1002/hem3.62 (PMC11106798; doi:10.1002/hem3.62), 2024-05-21

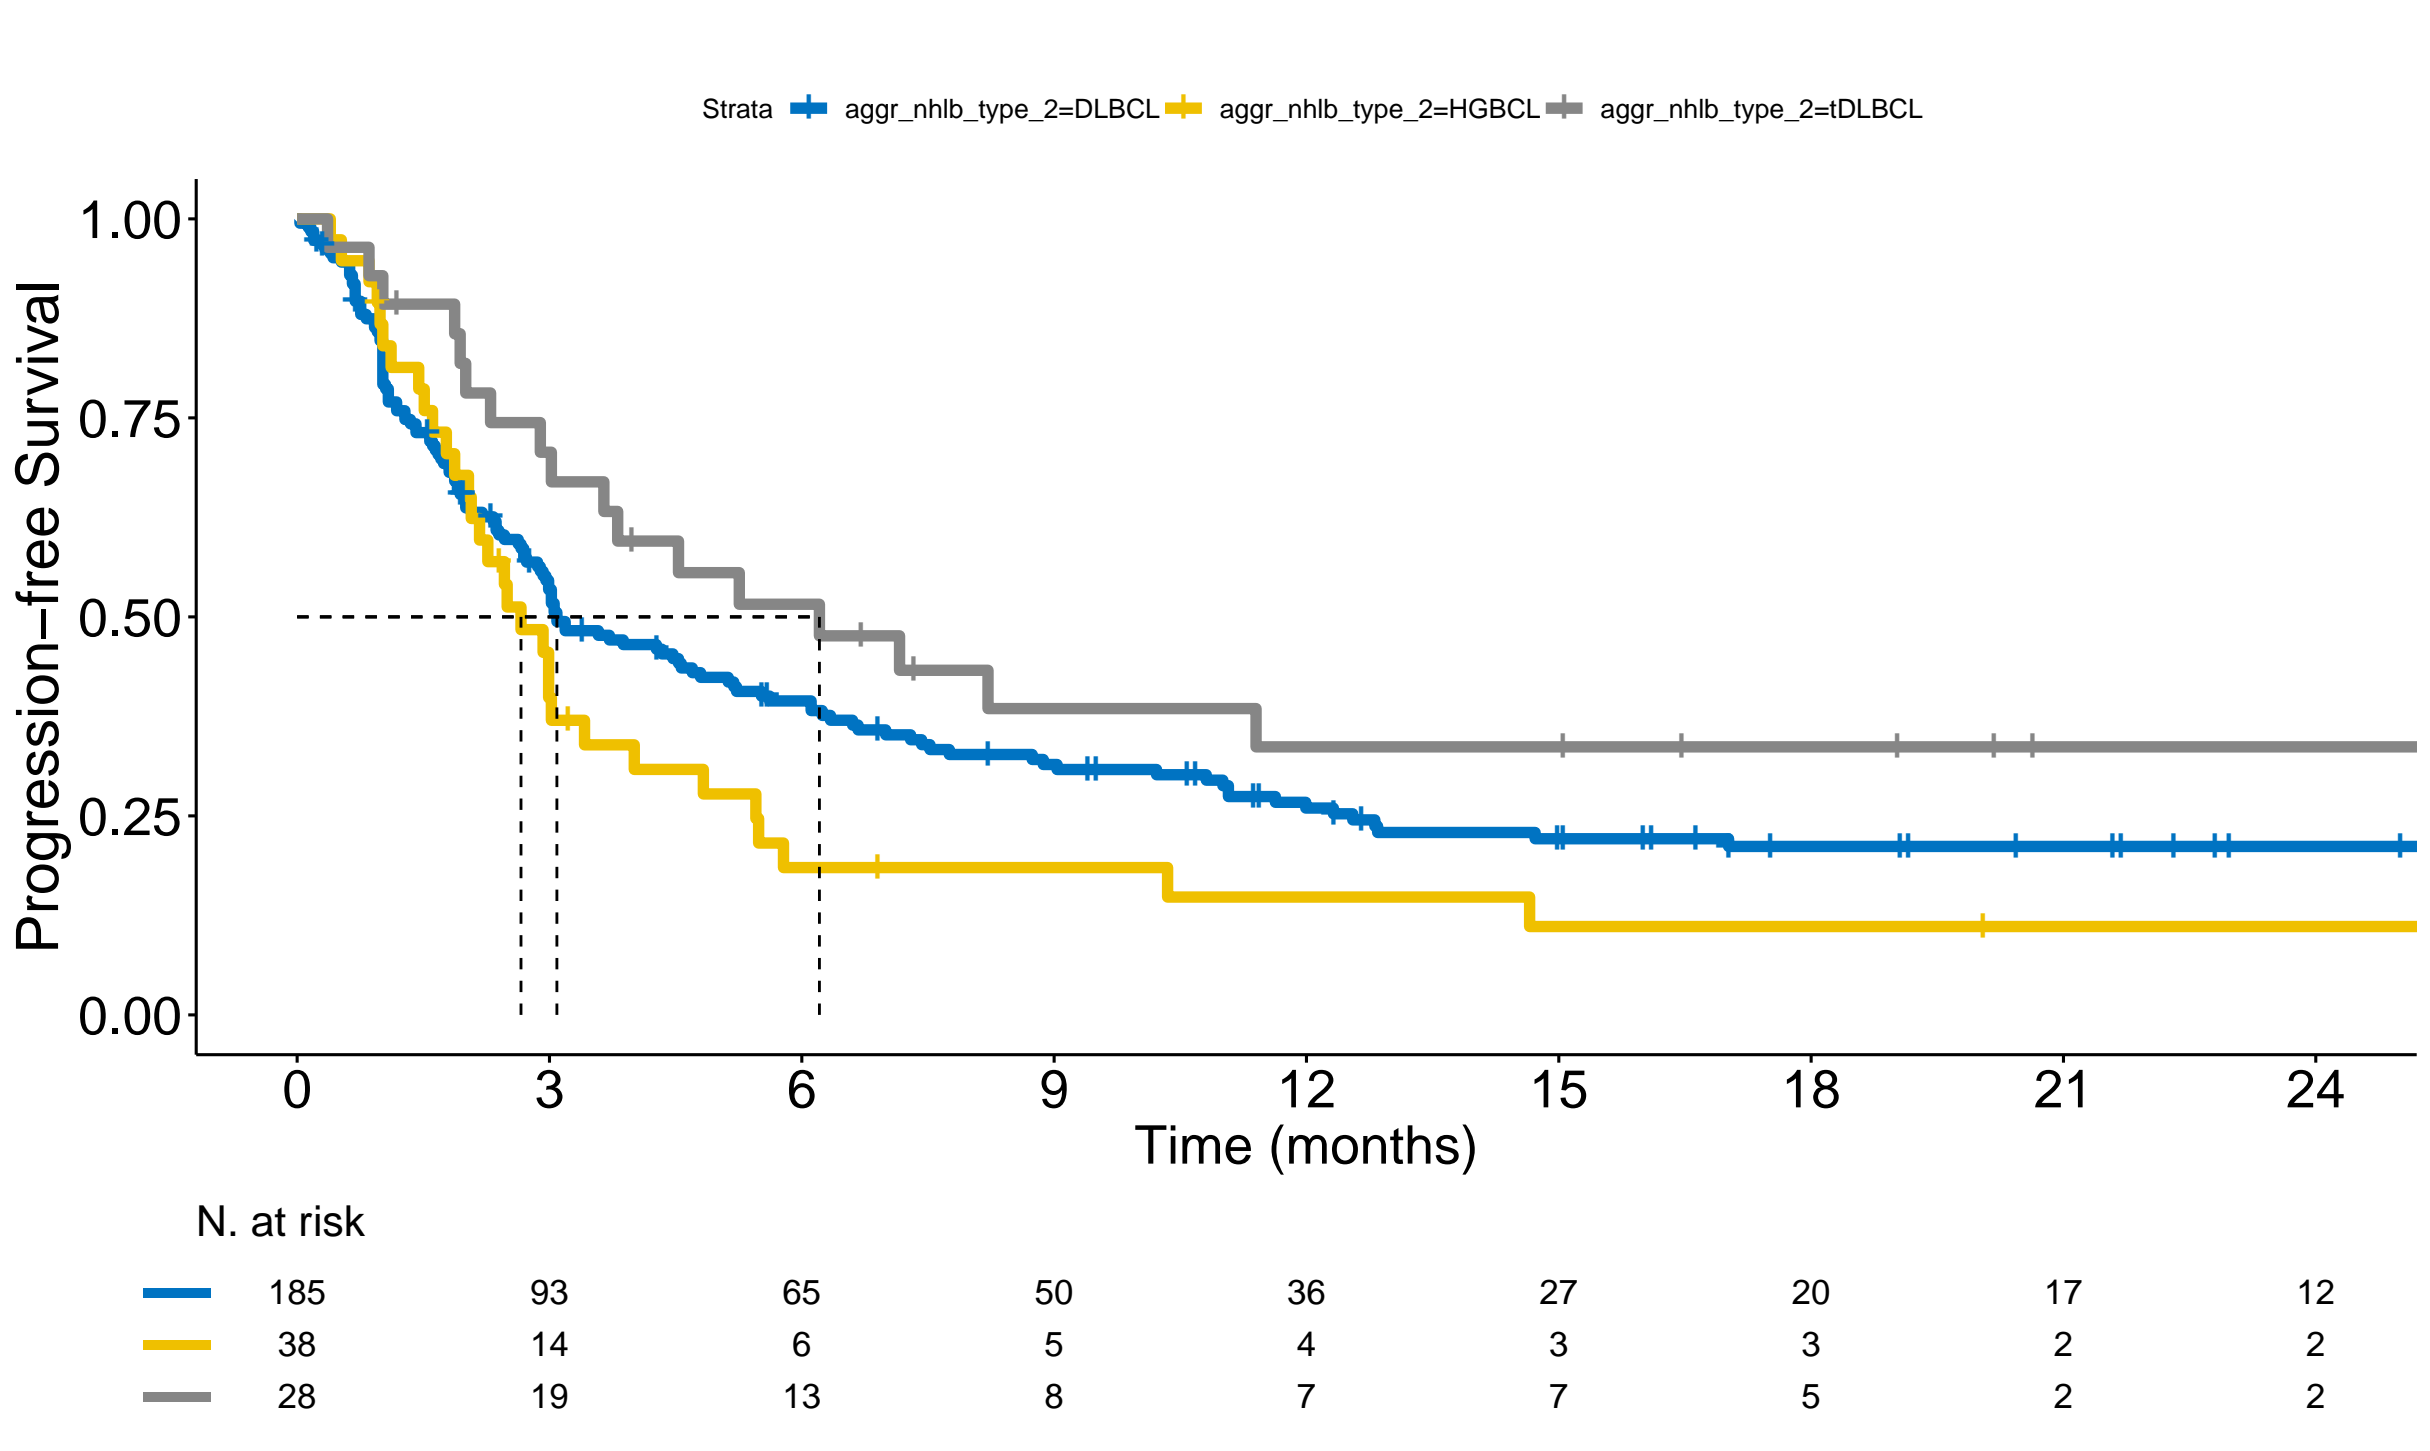

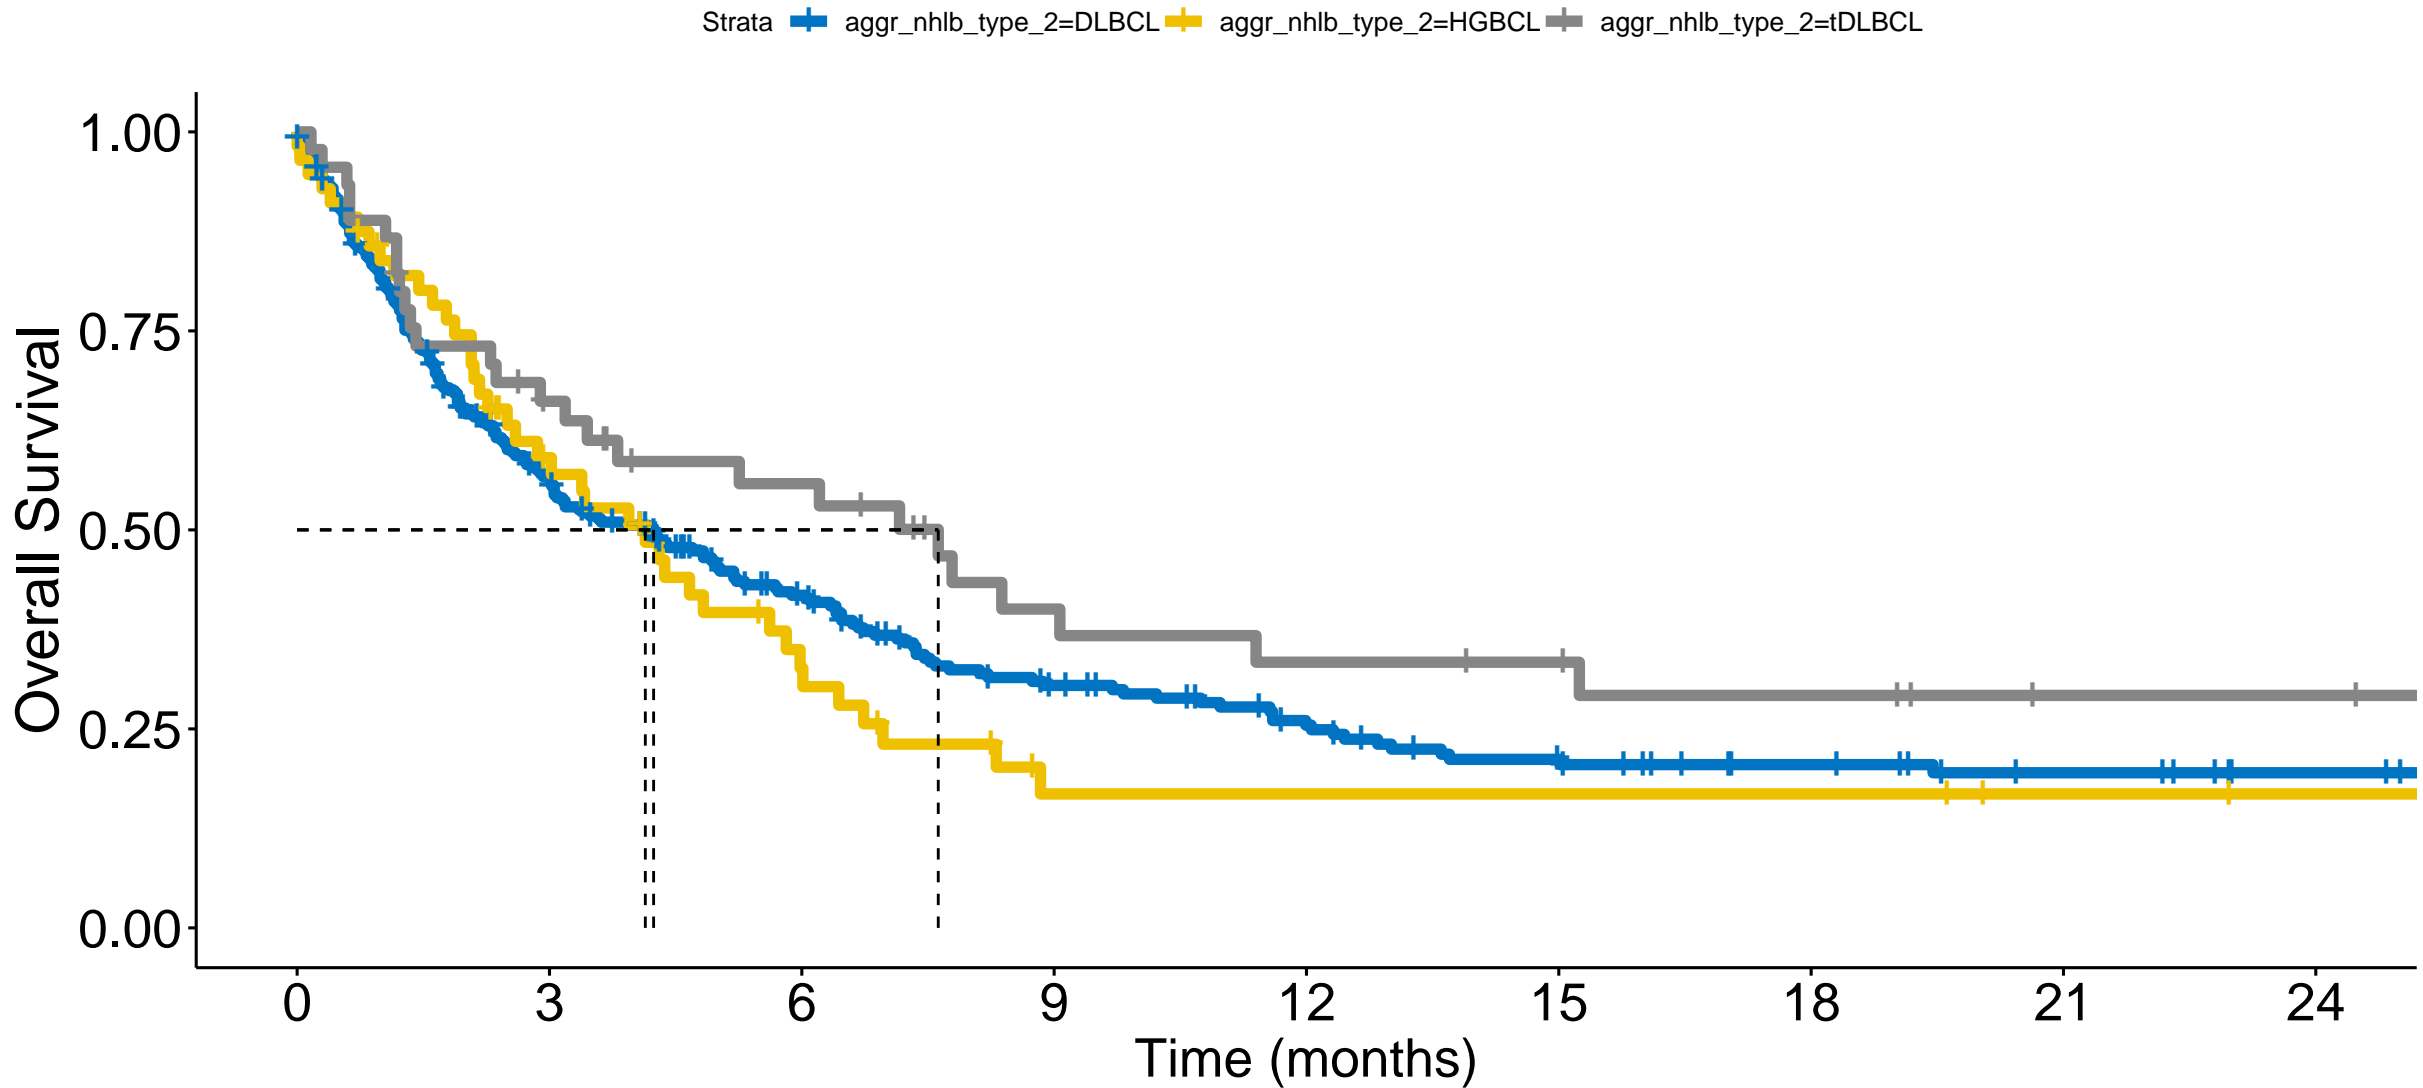

N. at risk

|   |     |     |    |    |    |    |    |    |    |
|---|-----|-----|----|----|----|----|----|----|----|
| — | 285 | 150 | 94 | 60 | 44 | 32 | 23 | 17 | 12 |
| — | 56  | 28  | 14 | 5  | 5  | 5  | 5  | 3  | 2  |
| — | 45  | 27  | 20 | 12 | 10 | 9  | 7  | 4  | 4  |

Supplement: HEM3-8-e62-s003.pdf [file HEM3-8-e62-s003.pdf]

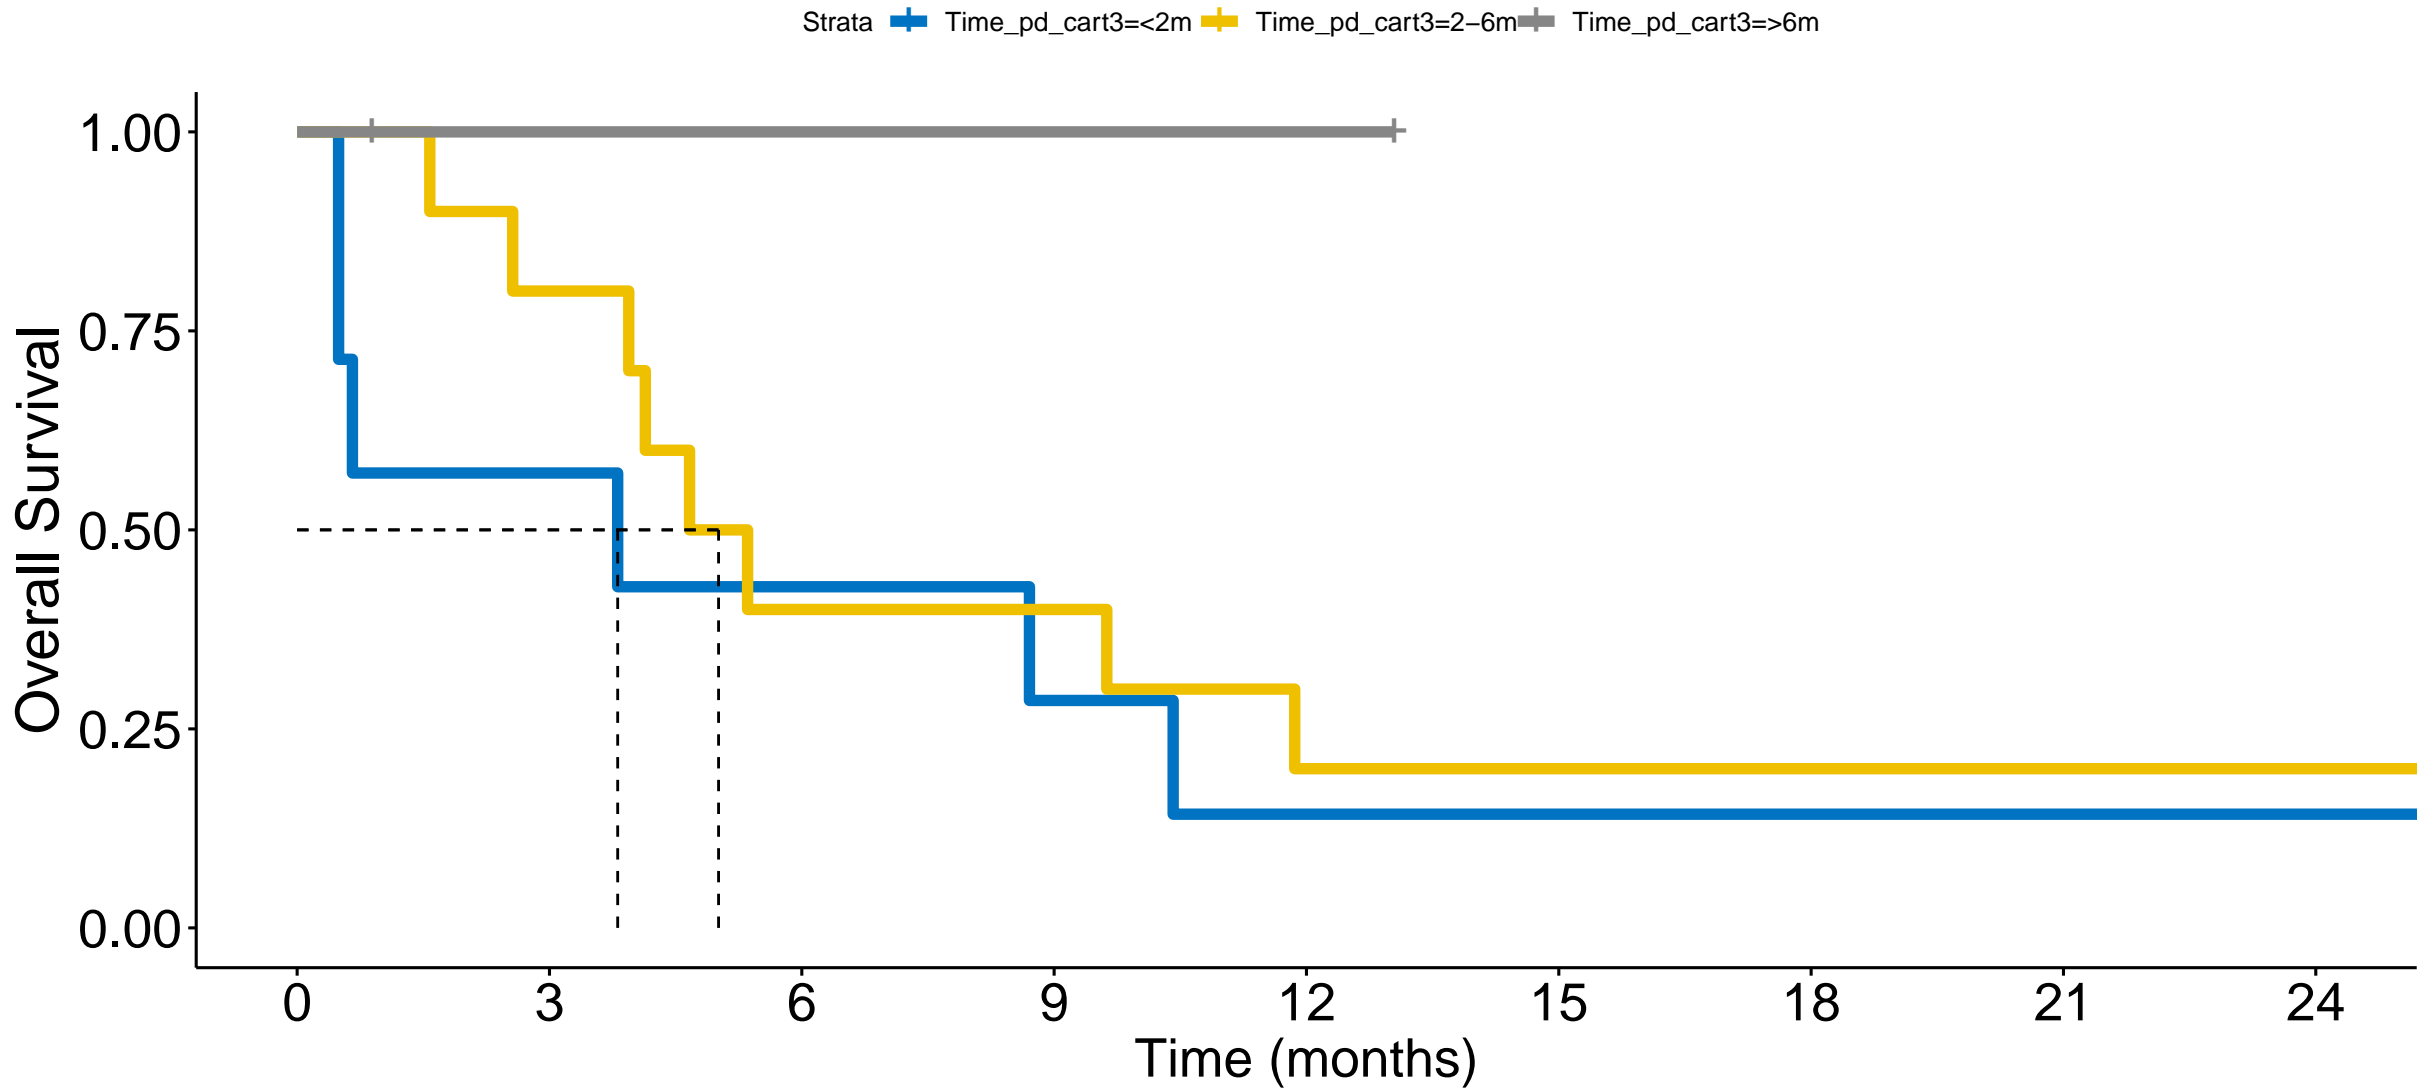

N. at risk

|    |   |   |   |   |   |   |   |   |   |
|----|---|---|---|---|---|---|---|---|---|
| 7  | 4 | 3 | 2 | 1 | 1 | 1 | 1 | 1 | 1 |
| 10 | 8 | 4 | 4 | 2 | 2 | 2 | 2 | 2 | 2 |
| 2  | 1 | 1 | 1 | 1 | 0 | 0 | 0 | 0 | 0 |

Supplement: HEM3-8-e62-s004.pdf [file HEM3-8-e62-s004.pdf]

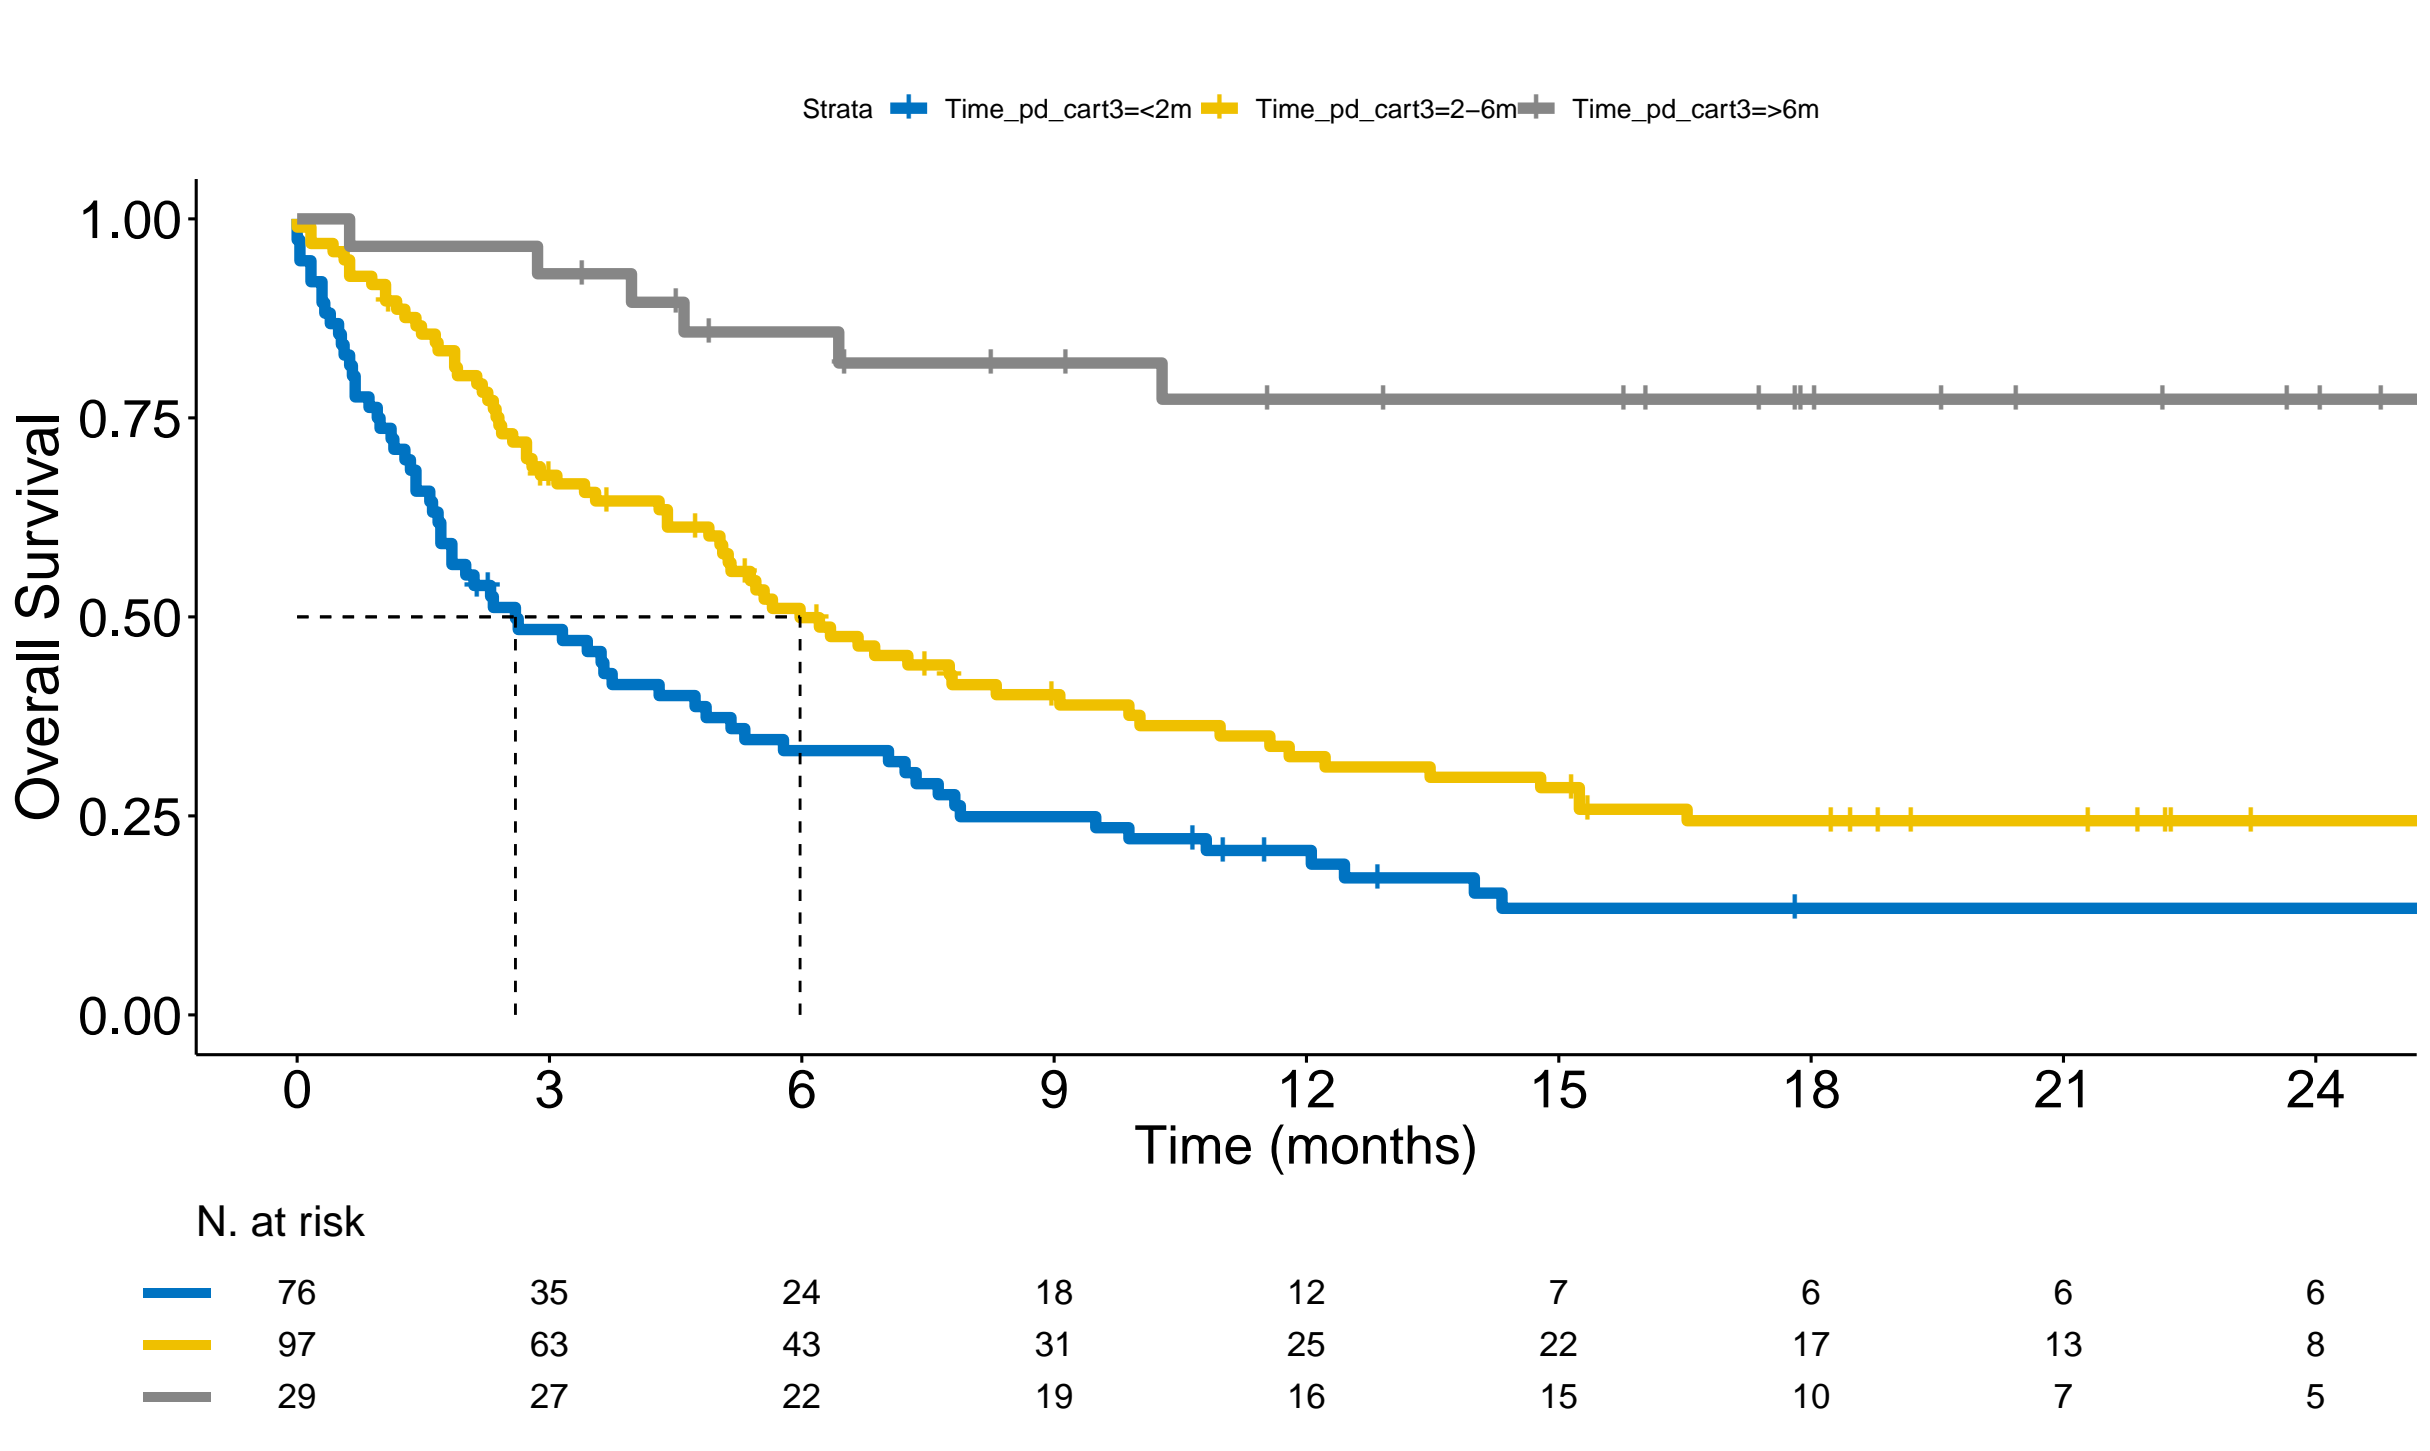

Supplement: HEM3-8-e62-s005.pdf [file HEM3-8-e62-s005.pdf]

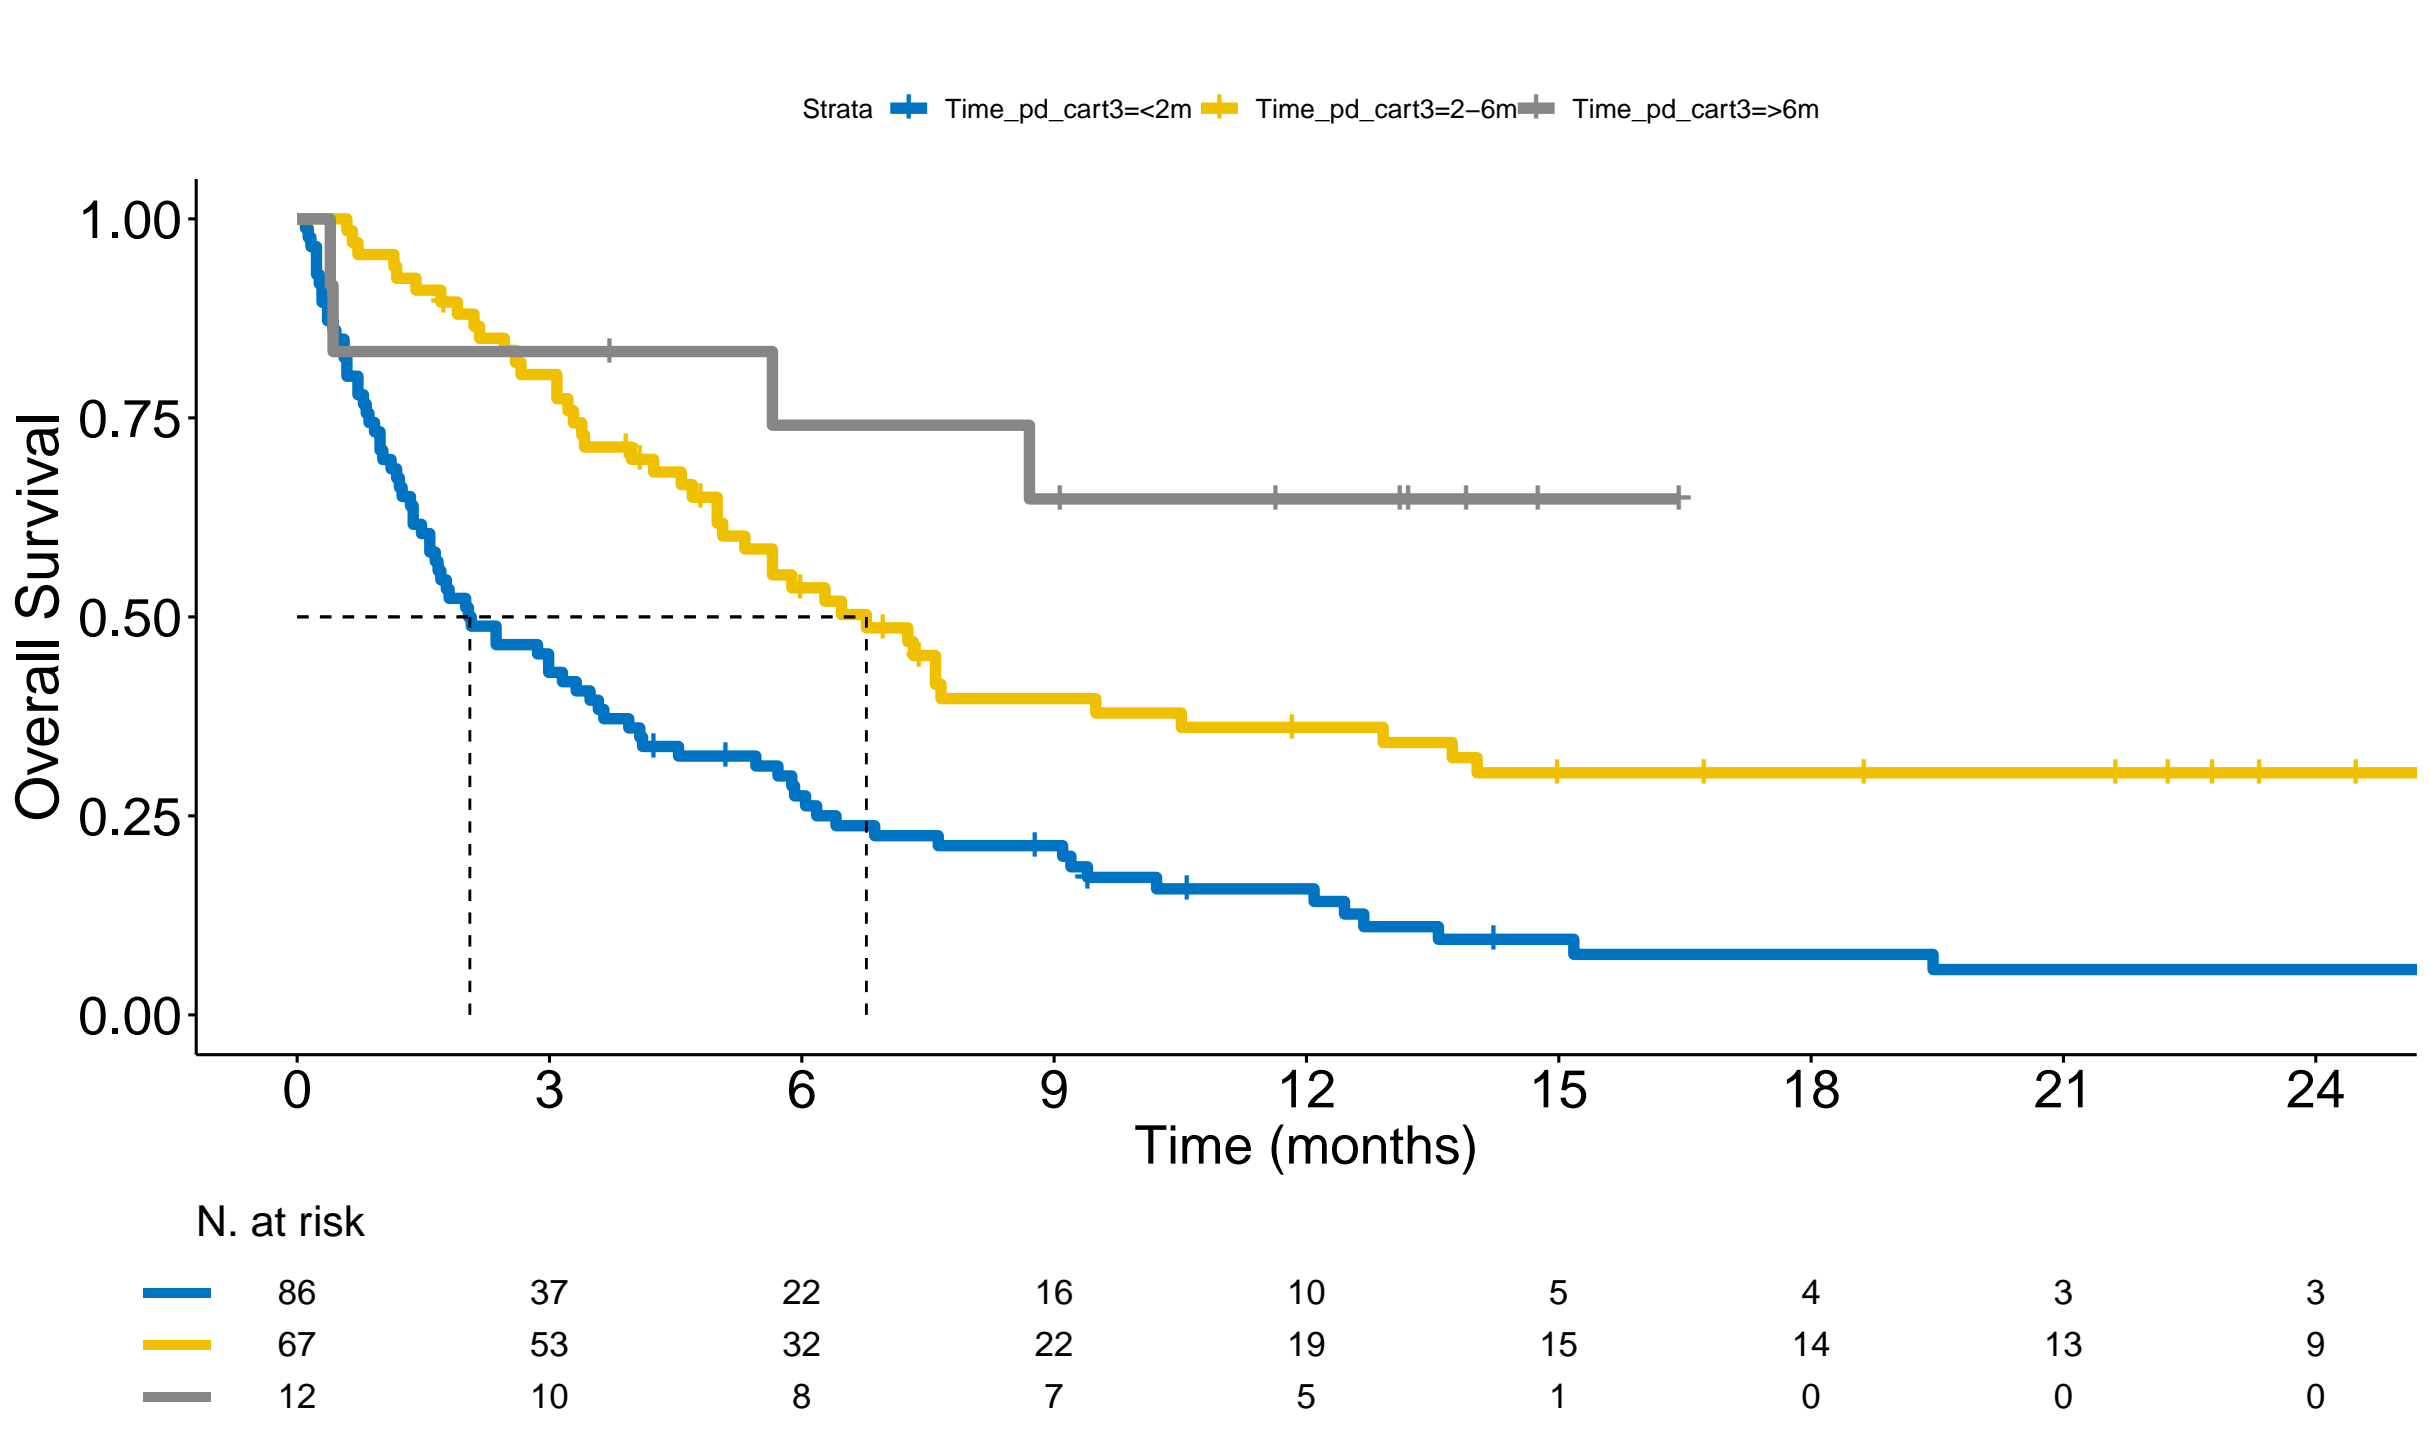

Supplement: HEM3-8-e62-s007.pdf [file HEM3-8-e62-s007.pdf]

### LENALIDOMIDE

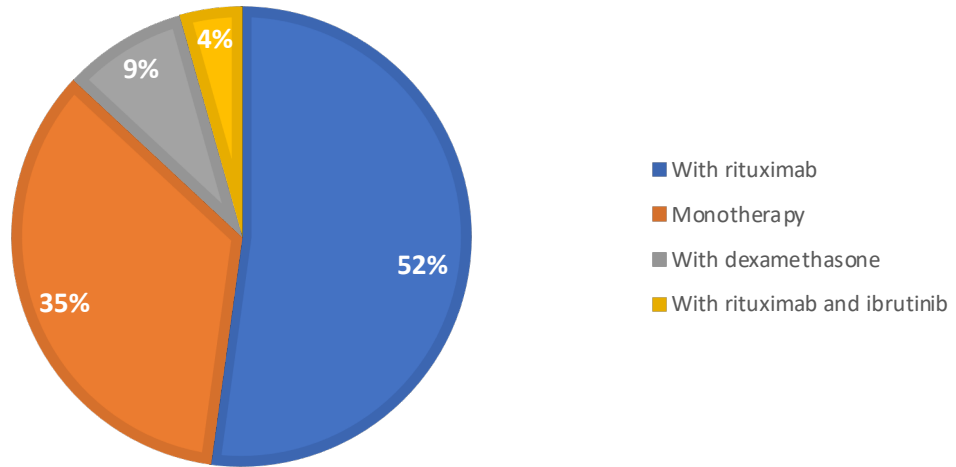

### IMMUNE CHECKPOINT INHIBITORS

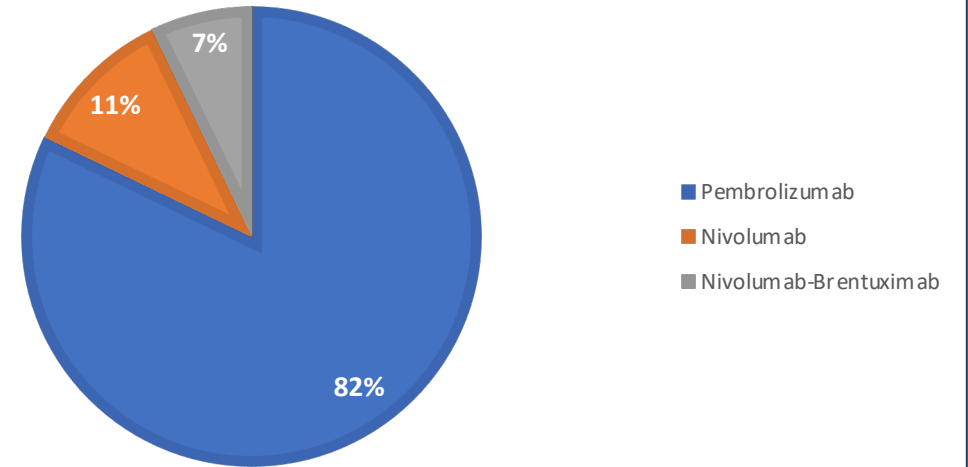

### BISPECIFIC ANTIBODIES

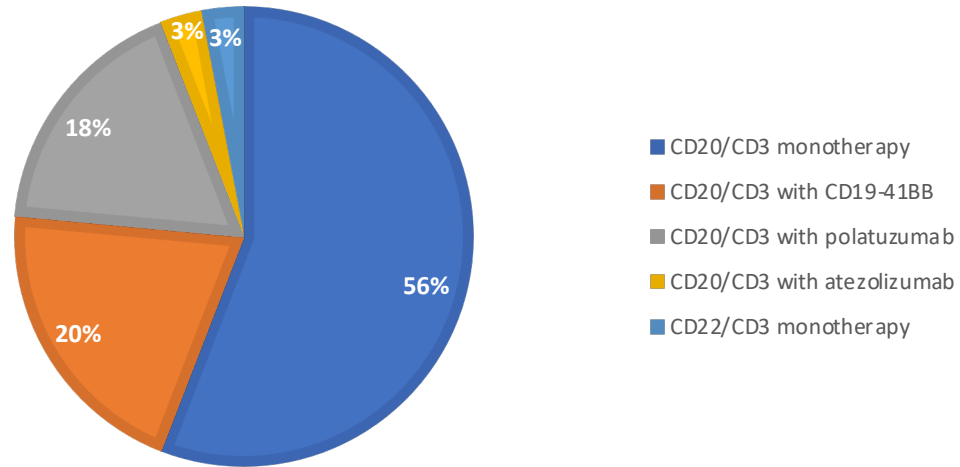

### CHEMOTHERAPY

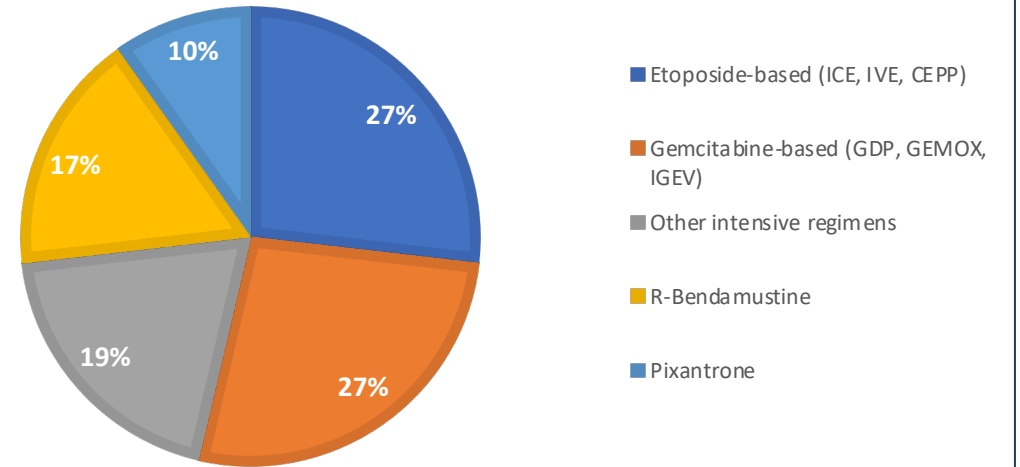

Supplement: HEM3-8-e62-s008.pdf [file HEM3-8-e62-s008.pdf]

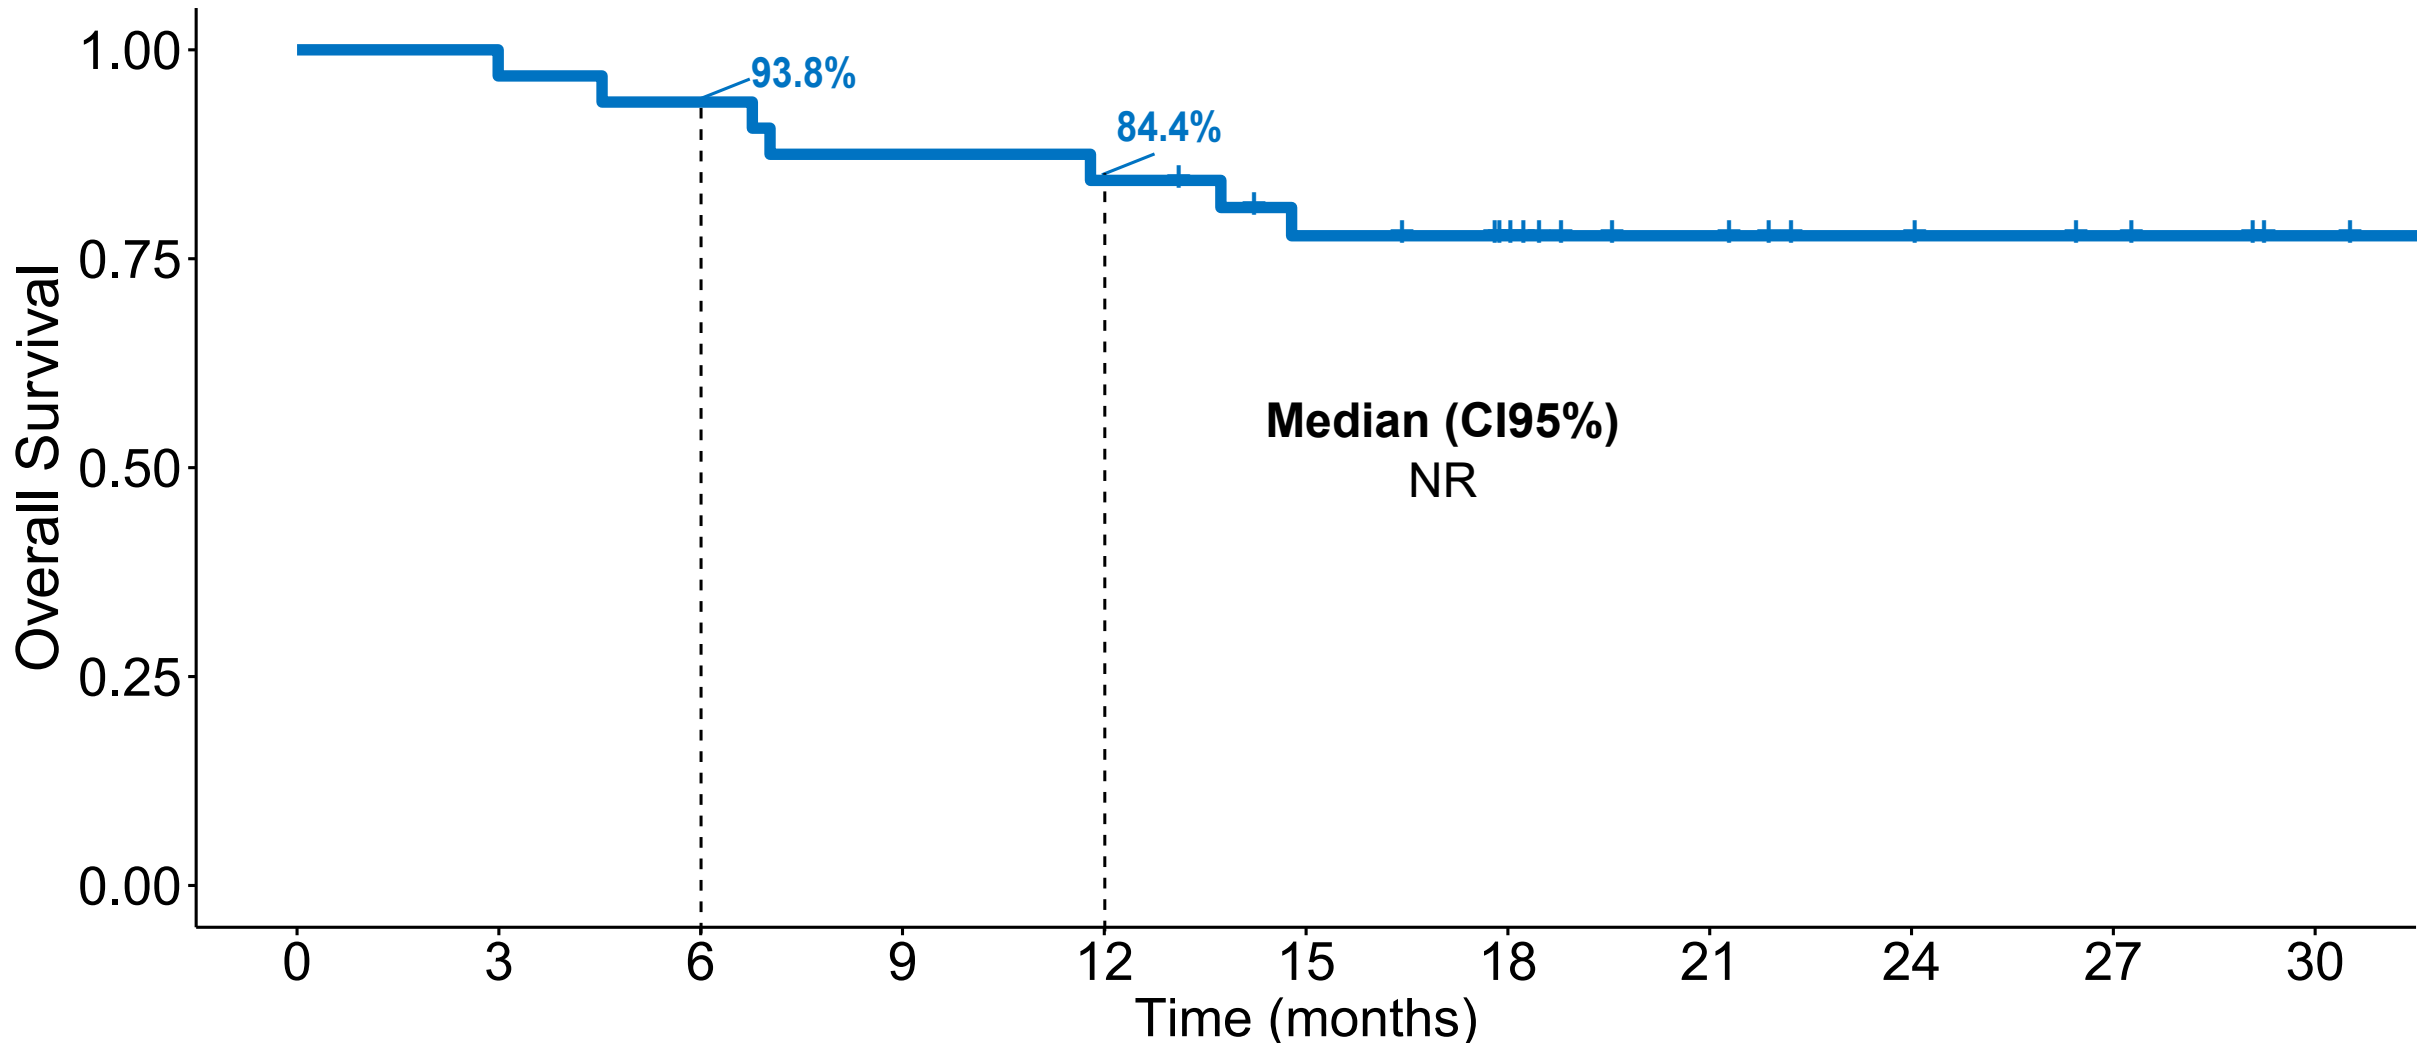

N. at risk

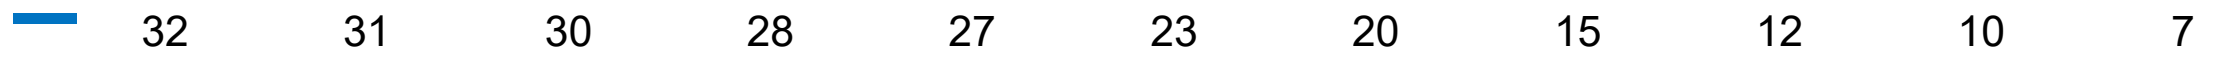

Supplement: HEM3-8-e62-s010.pdf [file HEM3-8-e62-s010.pdf]
